1 **Persistence of quantal synaptic vesicle recycling following dynamin depletion**

2

3 Olusoji A.T. Afuwape <sup>1</sup>, Natali L. Chanaday <sup>2</sup>, Merve Kasap <sup>2</sup>, Lisa M. Monteggia <sup>2,3</sup> and Ege T.  
4 Kavalali <sup>2,3,\*</sup>

5 <sup>1</sup> Department of Neurosurgery, University of Arkansas for Medical Sciences, 4301 W. Markham  
6 street, Little Rock, AR 72205

7 <sup>2</sup> Department of Pharmacology, Vanderbilt University, Nashville, TN 37240-7933, USA

8 <sup>3</sup> Vanderbilt Brain Institute, Vanderbilt University, Nashville, TN 37240-7933, USA

9

10 \* Corresponding author: (ege.kavalali@vanderbilt.edu)

11 Ege T. Kavalali, Department of Pharmacology, Vanderbilt University, Nashville, TN 37240.

12 Phone: 615-343-5480. E-mail: ege.kavalali@vanderbilt.edu

13

14 **Abstract**

15 Dynamins are GTPases required for pinching vesicles off the plasma membrane once a critical  
16 curvature is reached during endocytosis. Here, we probed dynamin function in central synapses  
17 by depleting all three dynamin isoforms in postnatal hippocampal neurons. We found a  
18 decrease in the propensity of evoked neurotransmission as well as a reduction in synaptic  
19 vesicle numbers. Using the fluorescent reporter vGluT1-pHluorin, we observed that  
20 compensatory endocytosis after 20 Hz stimulation was arrested in ~40% of presynaptic  
21 boutons, while remaining synapses showed only a modest effect suggesting the existence of a  
22 dynamin-independent endocytic pathway in central synapses. Surprisingly, we found that the  
23 retrieval of single synaptic vesicles, after either evoked or spontaneous fusion, was largely  
24 impervious to disruption of dynamins. Overall, our results suggest that classical dynamin-  
25 dependent endocytosis is not essential for retrieval of synaptic vesicle proteins after quantal  
26 single synaptic vesicle fusion.

27

## 28 Introduction

29 The robustness of synaptic transmission relies on the ability of retrieving, reforming and refilling  
30 synaptic vesicles after their fusion in a reliable and swift manner (Chanaday and Kavalali, 2017).  
31 Although the molecular machinery responsible for regulated secretion and endocytosis is  
32 conserved among species and cell types, some components have evolved to be more specific  
33 for neurons (Saheki and De Camilli, 2012; Soykan et al., 2016). During endocytosis, a critical  
34 step involves scission of the nascent vesicle from the plasma membrane. The observation of  
35 depleted synaptic vesicles and arrested budding endosomes in the shibire mutant fly (Koenig  
36 and Ikeda, 1989) led to the discovery of the GTPase dynamin as the essential protein catalyzing  
37 the fission of membranes (Antonny et al., 2016; Ferguson and De Camilli, 2012).

38 While *Drosophila* has a single gene for dynamin, mammals have three dynamin isoforms, all  
39 of which are expressed in the nervous system and are present at the synapse (Ferguson and  
40 De Camilli, 2012). Defects in synaptic vesicle recycling during high frequency stimulation have  
41 been described after deletion of the most abundant dynamin isoforms — dynamin 1 and 3 — in  
42 the nervous system; however, synaptic vesicle endocytosis persisted partly due to the more  
43 ubiquitously expressed isoform dynamin 2 (Ferguson et al., 2007; Raimondi et al., 2011). In  
44 superior cervical ganglion neurons, knock down of dynamin 2 revealed defects in rapid recovery  
45 of the readily releasable pool of synaptic vesicles after high frequency stimulation (Tanifuji et al.,  
46 2013). A similar finding was reported in chromaffin cells where after prolonged stimulation, a  
47 dynamin 2 dependent endocytosis mechanism was activated to retrieve vesicles (Artalejo et al.,  
48 2002). A function for dynamin 2 at the synapse is also supported by the finding that  $Ca^{2+}$  influx in  
49 neurons inhibits dynamin mediated endocytosis at the active zone and has been shown to  
50 reduce specifically dynamin 2 GTPase activity in HeLa cells (Cousin and Robinson, 2000).  
51 Taken together, all the different isoforms of dynamin have been functionally implicated in  
52 synaptic vesicle endocytosis with varying degrees of importance but with substantial overlap  
53 among them.

54 Assessing the role of all dynamin isoforms has been challenging due to the non-viability of  
55 dynamin triple knock out (TKO) animals. Instead, researchers have turned to the use of  
56 dynamin inhibitors such as dynasore and dyngo-4a which allowed elucidating the role of  
57 dynamin in multiple forms of endocytosis that reportedly operate at the synapse (Linares-  
58 Clemente et al., 2015; McCluskey et al., 2013; Watanabe et al., 2013). However, these dynamin  
59 inhibitors have been shown to also inhibit endocytosis in dynamin TKO fibroblasts suggesting  
60 that prior and future work with such inhibitors should be interpreted with caution (Park et al.,

61 2013). Moreover, off-target effects on other presynaptic pathways have been described (Douthitt  
62 et al., 2011).

63 In this study, we show that synaptic vesicle recycling and neurotransmission in cultured  
64 hippocampal neurons are unaffected by postnatal deletion of dynamin 2 indicating that this  
65 dynamin isoform is not essential for synaptic function. Moreover, we were able to deplete all  
66 three dynamin isoforms in cultures and found a decrease in the number of synaptic vesicles and  
67 number of docked vesicles within the synapse suggesting a role for dynamins in synaptic  
68 vesicle pool maintenance. More importantly, while the previously reported arrest in endocytosis  
69 was observed after 20 Hz stimulation using the fluorescent reporter vGluT1-pHluorin, we show  
70 that it occurs only in a fraction of all presynaptic boutons (~40%). The rest of synapses show  
71 only an intermediate effect or the complete absence of it revealing the presence of dynamin-  
72 independent endocytosis in central synapses. In line with this notion, we found that this  
73 dynamin-independent recycling of individual synaptic vesicles, after either evoked or  
74 spontaneous fusion, was largely impervious to disruption of actin, Arp2/3 and the dynamin-  
75 related protein (DRP) function. Our results suggest that retrieval of synaptic vesicle proteins  
76 does not require classical dynamin-dependent endocytic pathways after the release of single  
77 synaptic vesicles.

78

79

80

## 81 **Results**

### 82 **Dynamin 2 is not essential for synaptic vesicle recycling and neurotransmission**

83 Dynamin 2 catalyzes the scission of budding endosomes for various types of endocytosis apart  
84 from clathrin-mediated endocytosis (Cao et al., 2007; Liu et al., 2008; Schlunck et al., 2004) and  
85 it was reported to play a role in the exocytosis-endocytosis coupling of vesicles in mouse  
86 pancreatic  $\beta$ -cells (Min et al., 2007). In neurons, dynamin 2 has been reported to partially  
87 compensate for dynamin 1 knock out (KO) phenotype (Raimondi et al., 2011). Taken together,  
88 these findings hint at a potential role for dynamin 2 in synaptic vesicle recycling. Complete loss  
89 of dynamin 2 has proven to be too strenuous on developing tissue and as such, a complete  
90 dynamin 2 KO mouse is non-viable in utero (Ferguson and De Camilli, 2012). Here, we  
91 successfully knocked out dynamin 2 postnatally in dissociated hippocampal neuron cultures  
92 using dynamin 2 floxed (*dnm2f/f*) mice and lentiviral delivery of the Cre recombinase. We  
93 confirmed dynamin 2 conditional knock out (Dnm2 cKO) by western blot analysis (Figure 1A). At  
94 18 DIV, dynamin 2 levels were reduced by  $(92.5 \pm 1.5)\%$  in neurons expressing the Cre  
95 recombinase (Dnm2 cKO) compared to control neurons (Figure 1A). Maximal depletion of  
96 dynamin 2 was observed after 17 DIV and thus all subsequent experiments were conducted at  
97 17 DIV or later.

98 We next assessed synaptic vesicle recycling in the absence of dynamin 2 after high frequency  
99 stimulation using the optical indicator of synaptic vesicle exocytosis and endocytosis vGluT1-  
100 pHluorin (Kavalali and Jorgensen, 2014; Leitz and Kavalali, 2011; Voglmaier et al., 2006). After  
101 a 20 Hz 100 action potentials (APs) stimulation, there were no significant differences in the  
102 measured decay time constant ( $\tau$ ) in Dnm2 cKO synapses ( $\sim 46$  seconds) in comparison to WT  
103 littermate control synapses ( $\sim 49$  seconds) (Figure 1B-C), indicating normal endocytic kinetics in  
104 neurons depleted of dynamin 2. The exocytic load was also unaltered in the absence of  
105 dynamin 2, since the ratio of the fluorescence amplitude ( $\Delta F$ ) after the 20 Hz stimulus to the  
106 maximal possible response obtained by perfusing ammonium chloride was similar in both  
107 groups (data not shown). We then investigated the retrieval of single synaptic vesicles after  
108 evoked exocytosis in Dnm2 cKO neurons by measuring the dwell time, the amount of time the  
109 pHluorin probe spent on the presynaptic membrane before being retrieved (Leitz and Kavalali,  
110 2011; Chanaday and Kavalali, 2018). We observed no differences in dwell time in Dnm2 cKO  
111 neurons in comparison to the control suggesting that dynamin 2 is not required for retrieval after  
112 single synaptic vesicle release (Figure 1 - figure supplement 1A-B). In addition, amplitude of  
113 fusion events (Figure 1 - figure supplement 1C) and release probability (data not shown) were

114 similar for control and Dnm2 cKO neurons. Finally, we assessed the effects of the loss of  
115 dynamin 2 on synaptic transmission by voltage patch clamp recordings and observed no  
116 changes in average evoked and spontaneous excitatory (eEPSC and mEPSC, respectively)  
117 activity implying that dynamin 2 is not essential for synaptic transmission (Figure 1D-G and  
118 Figure 1 - figure supplement 1D-H). Taken together, these results suggest that dynamin 2 is not  
119 critical for synaptic vesicle recycling or neurotransmission.

### 120 **Synapse morphology in the absence of dynamins 1, 2 and 3**

121 Previous findings suggested the possibility of dynamin-independent endocytic mechanisms in  
122 neurons (Xu et al., 2008). To explore the role of all three dynamin isoforms in synaptic vesicle  
123 recycling, we crossed a knock-out (KO) mouse line for dynamin 3 and mice with floxed dynamin  
124 1 and 2 genes. After Cre recombinase treatment, triple knock-out (TKO) neurons for all dynamin  
125 isoforms were obtained (Dnm TKO). We used hippocampal neuron cultures from littermate  
126 animals infected with the empty vector (expressing only GFP) as controls (Dnm3 KO). We used  
127 Dnm3 KOs as controls in order to obtain more consistent comparisons within littermates based  
128 on the observation that Dnm3 KOs do not show significant functional or structural deficits  
129 (Ferguson et al., 2007; Raimondi et al., 2011). To confirm that all 3 dynamin isoforms were  
130 knocked out we measured protein levels by Western blot (using a pan-dynamin antibody; Liu et  
131 al., 2008) and mRNA expression by q-RT PCR. While protein levels of all dynamins were  
132 reduced by (92.9±0.4)% (Figure 1H), mRNA levels of dynamins 1 and 2 were reduced >99%  
133 while dynamin 3 mRNA was reduced >95% in Dnm TKO neurons (Figure 1 – figure supplement  
134 2A), indicating that all dynamins are significantly depleted under these conditions. We then  
135 analyzed synapse morphology using electron microscopy (EM) in Dnm TKO neurons and  
136 observed no gross distortions in synapse morphology at rest. However, we found a significant  
137 decrease in the total synaptic vesicle number (~65 vs 44) and the number of docked vesicles  
138 (~3 vs 1.5) in Dnm TKO neurons in comparison to Dnm3 KO littermate control neurons (Figure  
139 1I-K). Given that neurons and synapses are only starting to develop and mature at the time of  
140 lentiviral infection, we next evaluated the effects of loss of dynamins on synapse numbers. We  
141 labeled Dnm TKO and control cultures for inhibitory synapses using an antibody against the  
142 vesicular GABA transporter (vGAT) and excitatory synapses using an antibody against the  
143 vesicular glutamate transporter (vGluT). We observed no significant differences in the total  
144 number of excitatory and inhibitory synapses per  $\mu\text{m}^2$  in Dnm TKO cultures compared to  
145 littermate controls (Figure 1L-N). This data suggests that dynamin is required for the  
146 maintenance of synaptic vesicle pool size and the docking of synaptic vesicles at rest but not for

147 synapse formation.

148 **Synaptic vesicle recycling during high frequency stimulation in neurons depleted of**  
149 **dynamins 1,2,3**

150 Next, we assessed synaptic vesicle endocytosis in response to 100 APs at 20 Hz (5 s) by  
151 expressing vGluT1-pHluorin in Dnm TKO neurons (Figure 2A). We observed three categorically  
152 different responses to the 20 Hz stimulus in neurons depleted of dynamins: synapses that  
153 recovered completely after 20 Hz stimulation, synapses that recovered to a baseline higher than  
154 the baseline prior to stimulation (partial recovery) and those that did not recover after stimulation  
155 (Figure 2B). To quantify this phenotype, we first calculated the amount of retrieval ( $\Delta F_{\text{ret}}$ ) as the  
156 difference between baseline level increase after stimulation and response amplitude ( $\Delta F$ ), and  
157 then obtained the percentage of retrieval by dividing  $\Delta F_{\text{ret}}$  by  $\Delta F$ . We observed that in Dnm3 KO  
158 littermate controls, 90% of synapses recovered to 80% of the initial baseline within 150 s after  
159 stimulation, while around 60% of synapses recovered to at least 80% of the initial baseline  
160 within 150 s post stimulus in Dnm TKO neurons. This suggests that even if all three dynamin  
161 isoforms are significantly reduced, synaptic vesicles can still undergo normal endocytosis in  
162 more than half of hippocampal synapses (Figure 2B-C). We observed a decrease in the ratio of  
163  $\Delta F$  to the maximal possible response,  $F_{\text{NH}_4\text{Cl}}$  ( $\Delta F/F_{\text{NH}_4\text{Cl}}$ ) in Dnm TKO compared to control  
164 (Figure 2D) suggestive of a decrease in release probability in the absence of all dynamins and  
165 corroborating our finding of decreased number of docked vesicles via EM (Figure 1K). We also  
166 detected an overall decrease in  $F_{\text{NH}_4\text{Cl}}$  in Dnm TKO neurons in comparison to control suggesting  
167 a possible decrease in synaptic vesicle pool size as well (data not shown, but see Figure 1J).  
168 Finally, we estimated the kinetics of endocytosis by fitting the decay to baseline after stimulus  
169 with a single exponential decay function and used the decay time constant ( $\tau$ ) as a measure of  
170 endocytic rate. We observed a drastic increase in decay  $\tau$  in Dnm TKO neurons indicating a  
171 slow-down in synaptic vesicle retrieval after high frequency stimulation (Figure 2E). Taken  
172 together, these results suggest that dynamins are important but not essential for synaptic  
173 vesicle recycling during high frequency neuronal activity.

174 Given our observation of almost normal synaptic vesicle endocytosis for ~60% of synapses after  
175 20 Hz stimulation, we next asked whether the retrieved vesicles are available for re-release. We  
176 stimulated synaptic uptake of FM5-95 dye by incubating Dnm TKO and littermate control  
177 neurons in 45 mM  $\text{K}^+$  modified Tyrode's solution containing 18  $\mu\text{M}$  FM5-95 dye for 2 minutes.  
178 Excess dye was washed out, and then we applied a second stimulation to trigger synaptic  
179 vesicle exocytosis and dye release by incubating neuronal cultures in 90 mM  $\text{K}^+$  modified

180 Tyrode's solution for 90 s, two consecutive times (Figure 2F). We observed a decrease in  
181 fluorescence indicative of dye release in both littermate control and Dnm TKO synapses (Figure  
182 3F). However, the decrease in fluorescence in response to 90 mM K<sup>+</sup> stimulation was greater in  
183 littermate controls than in Dnm TKO (Figure 2G) and it also occurred with a slower time-course  
184 in Dnm TKO synapses (Figure 2H). These results suggest that depletion of dynamins reduces  
185 the total pool size of synaptic vesicles and the remaining vesicles show slower mobilization and  
186 recovery compared to controls during strong depolarization. Our findings are also consistent  
187 with a function for dynamins in the regulation of synaptic vesicle release probability (Lou et al.,  
188 2012 and see below).

### 189 **Single synaptic vesicle endocytosis is dynamin independent**

190 So far, we have described dynamin function in synaptic vesicle recycling during strong  
191 stimulation. To address the importance of dynamins in the recycling of individual synaptic  
192 vesicles, we applied sparse, single AP stimulation to Dnm TKO hippocampal neuron cultures  
193 expressing vGluT1-pHluorin. We observed no change in the amplitude of single synaptic vesicle  
194 fusion events in Dnm TKO synapses in comparison to littermate control Dnm3 KO synapses  
195 (Figure 2I-K). No differences were observed in the distribution of dwell times in presynaptic  
196 boutons from both groups (Figure 2L). Moreover, exponential fitting of the ensemble average  
197 traces from Dnm3 KO and TKO groups revealed the presence of two phases of decay, one  
198 ultrafast (~300 ms) and one fast (~6-8 s) of similar characteristics for both groups (Figure 2I-J)  
199 (see Chanaday and Kavalali, 2018). This further supports the absence of defects in retrieval and  
200 re-acidification in dynamin TKO neurons compared to Dnm3 KO. Finally, we categorized the  
201 single synaptic vesicle fusion events into three groups based on the event profile (see sample  
202 traces in Figure 2I-J). Rapid decay were events that decayed almost instantaneously after  
203 fusion (<500 ms) and may correspond to ultrafast endocytosis events. Short dwell were events  
204 that resided on the membrane for more than 500 ms and decayed to baseline before the end of  
205 the allotted timeframe (500 ms – 10 s). Long dwell were events that did not decay to baseline  
206 within the allotted time window (> 10 s). We measured the fractional composition of the single  
207 synaptic vesicle fusion events in these three categories and noted no changes in the distribution  
208 between Dnm TKO and littermate control Dnm 3 KO synapses (Figure 2M). Long dwell events,  
209 which are indicative of protein stranded at the plasma membrane and not retrieved during the  
210 imaging window, constituted 19±1% of total dynamin TKO single vesicle events in comparison  
211 to 21±1% of total control single vesicle events (Figure 2M). We also looked at the fractional  
212 composition of single synaptic vesicle events from Dnm TKO synapses with severe retardation



213 of synaptic vesicle endocytosis after high frequency stimulation and observed that only ~1% of  
214 single vesicle events from these synapses were long-dwell events. This observation suggests  
215 that the negative impact of dynamin loss-of-function in these synapses was limited to multi-  
216 vesicle endocytosis and the dynamin-regulation of single vesicle versus multi-vesicle retrieval  
217 events are relatively independent (Figure 2M). We assessed the distribution of rapid decay and  
218 short dwell events and observed no differences between Dnm 3 KO and Dnm TKO (Figure 2M).  
219 Taken together, our data suggest that the kinetic properties of single synaptic vesicle retrieval  
220 are largely dynamin independent.

### 221 **Dynamins are not essential for Ca<sup>2+</sup> dependent delay in single synaptic vesicle retrieval**

222 Prior work in our lab has demonstrated that increasing extracellular Ca<sup>2+</sup> can slow down  
223 endocytosis after single synaptic vesicle release (Leitz and Kavalali, 2011). This retardation in  
224 synaptic vesicle retrieval is dependent on synaptotagmin-1 (syt1), the Ca<sup>2+</sup> sensor for  
225 synchronous synaptic vesicle exocytosis (Li et al., 2017; Chanaday and Kavalali, 2018). In  
226 chromaffin cells, syt1 has been shown to interact directly with the PH domain of dynamin 1  
227 (Dnm1) to regulate the fission pore of single dense core vesicles (McAdam et al., 2015). To  
228 address the role of dynamins in the modulation of synaptic vesicle retrieval kinetics by Ca<sup>2+</sup>, we  
229 increased extracellular Ca<sup>2+</sup> concentration to 8 mM and evoked single synaptic vesicle release  
230 in Dnm TKO and littermate control neurons (Figure 3A-B). We observed no differences in the  
231 amplitude of single synaptic vesicle fusion events in these conditions (Figure 3C). The  
232 distribution of dwell times (Figure 3D) as well as the two components of fluorescence decay for  
233 the average traces (Figure 3A-B) were similar for Dnm3 KO and Dnm TKO synapses. This  
234 result indicates that Ca<sup>2+</sup> can slow down single synaptic vesicle endocytosis in synapses lacking  
235 all dynamin isoforms, as described before for wild-type neurons (Leitz and Kavalali, 2011; Li et  
236 al., 2017) leading us to conclude that dynamins are not essential for Ca<sup>2+</sup>-dependent  
237 prolongation of single synaptic vesicle dwell time. Moreover, based on the analysis of the  
238 ensemble averaged fluorescent traces, the kinetics of ultrafast endocytosis and fast endocytosis  
239 components of retrieval do not seem to be modulated by dynamins (Chanaday and Kavalali,  
240 2018).

### 241 **Inhibitory neurotransmission after depletion of dynamins**

242 Our data suggests that the postnatal deletion of dynamin results in a decreased pool size of  
243 synaptic vesicles that can recycle with sparse stimulation but are limited upon high frequency  
244 stimulation. Prior work has demonstrated that the efficiency of synaptic vesicle endocytosis is  
245 dependent on the preceding exocytic load (Armbruster et al., 2013). Inhibitory synapses have

246 been reported to undergo tonic neurotransmission and as such require more efficient endocytic  
247 mechanisms to maintain fidelity of neurotransmission (Evergren et al., 2006; Swadlow, 2003).  
248 Therefore, synaptic vesicle recycling in non-glutamatergic synapses might be different from  
249 glutamatergic synapses. To assess the dynamin dependence of inhibitory transmission, we  
250 recorded evoked inhibitory postsynaptic currents (eIPSC) in Dnm TKO neurons (Figure 4). We  
251 observed a decrease in the average eIPSC amplitude (0.8 nA vs 1.3 nA) in Dnm TKO neurons  
252 in comparison to the littermate controls (Figure 4A). We applied a train of 30 pulses at 1 Hz and  
253 observed similar levels of synaptic depression in Dnm TKO and littermate control cultures  
254 (Figure 4B-C). Similarly, we observed similar levels of synaptic depression after we challenged  
255 Dnm TKO and littermate control neurons with a 400 pulse 10 Hz train stimulus (Figure 4D-E).  
256 However, when we stimulated with 1000 pulses at 30 Hz frequency, we observed an initial  
257 synaptic facilitation in Dnm TKO neurons that was absent in littermate control Dnm3 KO  
258 neurons. This data is consistent with the premise that the absence of dynamin in inhibitory  
259 neurons leads to a decrease in release probability. We also investigated spontaneous or  
260 miniature inhibitory neurotransmission (mIPSC) in the presence of tetrodotoxin (TTX). We  
261 observed no significant changes in the frequency of mIPSC events between groups (1.8 Hz vs  
262 1.4 Hz) but found a rightward shift in the cumulative distribution of amplitudes for Dnm TKO  
263 neurons indicative of an overall increase in mIPSC amplitude (Figure 4G-I). Since no alterations  
264 in synaptic vesicle size were found by EM (data not shown), this could indicate differences in  
265 postsynaptic levels of GABA receptors. In conclusion, for inhibitory synapses, depletion of all  
266 three dynamin isoforms leads to a reduction of evoked release probability and an increase in  
267 amplitude of spontaneous postsynaptic responses.

### 268 **Loss of dynamins 1, 2 and 3 impairs excitatory neurotransmission**

269 Excitatory neurotransmission was previously shown to have reduced release probability and a  
270 decrease in the amplitude of postsynaptic currents in the absence of the neuronal dynamin  
271 isoforms, dynamin 1 and 3. These alterations could be reversed by chronic suppression of  
272 activity (Lou et al., 2012) indicating that it results from vesicle depletion due to the endocytic  
273 arrest. To evaluate excitatory neurotransmission when all dynamin isoforms are depleted, we  
274 measured evoked excitatory postsynaptic currents (eEPSC) in Dnm TKO hippocampal neurons  
275 (Figure 5). We observed a significant decrease in eEPSC amplitude (1.1 nA vs 0.1 nA) in Dnm  
276 TKO neurons (Figure 5A) accompanied by facilitation to a train of 1 Hz and 10 Hz stimuli (Figure  
277 5B-E) suggestive of a decrease in the probability of release in Dnm TKO neurons compared to  
278 Dnm3 KO littermate control. We also investigated changes in spontaneous neurotransmission in

279 the presence of TTX in Dnm TKO neurons. We observed a decrease in mEPSC frequency (1.7  
280 Hz vs 0.7 Hz) and an increase in mEPSC amplitude (Figure 5F-H) in Dnm TKO neurons  
281 compared to control. These findings are consistent with prior reports assessing excitatory  
282 neurotransmission defects in constitutive dynamin 1,3 double KO neurons (Lou et al., 2012)  
283 pointing to a negligible role for dynamin 2 in excitatory neurotransmission.

### 284 **Spontaneously fused synaptic vesicles recycle independently of actin, DRP-1 and Arp2/3** 285 **complex in dynamin TKO neurons**

286 Our results so far have revealed that dynamin is not required for the recycling of a single  
287 synaptic vesicle after either evoked or spontaneous fusion. We next attempted to identify crucial  
288 proteins for the recycling of a single synaptic vesicle in Dnm TKO neurons. In multiple cell types,  
289 dynamin is localized to Arp2/3 complex enucleated actin meshwork (Baldassarre et al., 2003;  
290 Gold et al., 1999; Lee and De Camilli, 2002; Orth et al., 2002; Schlunck et al., 2004). Similarly,  
291 during clathrin-mediated endocytosis, both actin and dynamin are recruited to the site of  
292 retrieval in the early phase suggesting a functional significance in initiation and maturation of  
293 clathrin-coated pits (Grassart et al., 2014). In both the large calyx of Held and small central  
294 hippocampal synapses, knockout of actin isoforms revealed that actin functions in all forms of  
295 synaptic vesicle endocytosis (Wu et al., 2016). Here, we explored the role of actin and Arp2/3  
296 complex in the recycling of single synaptic vesicles by using the small molecule inhibitors  
297 Latrunculin A and CK-666 to inhibit actin and Arp2/3 complex, respectively. We also assessed  
298 dynamin-related protein 1 (DRP-1) function in synaptic vesicle recycling using the specific  
299 inhibitor Mdivi-1, as previous studies described that mutations in DRP in *Drosophila* leads to  
300 synaptic vesicle depletion (Rikhy et al., 2007). We knocked out all isoforms of dynamin in  
301 cultured hippocampal neurons and recorded mEPSC events before and after acute (10 min)  
302 treatment with each small molecule inhibitor (Figure 6). These experiments did not reveal  
303 significant differences in mEPSC frequency after treatment with Latrunculin A, CK-666 or Mdivi-  
304 1 (Figure 6A-B). Taken together, our findings suggest that dynamin, actin, arp2/3 complex and  
305 DRP-1 do not play a major role in the recycling of single spontaneously released synaptic  
306 vesicles.

307

## 308 **Discussion**

309 In this study, to investigate the functional diversity of dynamins, we established a colony of  
310 dynamin mutant mice comprised of dynamin-1 and dynamin-2 conditional knockouts  
311 (expressing floxed alleles of dynamin-1 and -2), and dynamin-3 constitutive knockouts. Using  
312 conditional knockouts to suppress dynamin expression in vitro, we could avoid systemic effects  
313 and impair dynamin function after synaptogenesis thus circumventing major developmental  
314 effects. When we assessed dynamin-2 loss-of-function in synaptic vesicle recycling and  
315 neurotransmission, we did not observe any apparent defects after the postnatal deletion of  
316 dynamin-2. In contrast, depletion of all three dynamins (dynamin-1, -2 and -3) in hippocampal  
317 neurons in culture impaired neurotransmission, including a decrease in release probability and  
318 also a substantially slowed endocytosis after high frequency stimulation (20 Hz). These effects  
319 were more pronounced in recordings of glutamatergic synaptic transmission compared to  
320 GABAergic neurotransmission suggesting a potential difference in dynamin-dependence  
321 between the two neurotransmitter systems. We also visualized dynamin TKO synapses via  
322 electron microscopy and observed decreases in both synaptic vesicle number and number of  
323 docked vesicles, which may in part account for the decrease in evoked neurotransmitter release  
324 probability.

325 Despite the apparent decrease in evoked release, the frequency of spontaneous  
326 neurotransmitter release events (as detected by postsynaptic voltage-clamp recordings) and the  
327 kinetics of single vesicle fusion-retrieval events (as detected optically) were only mildly affected.  
328 This surprising result is, nevertheless, consistent with earlier findings based on alternative  
329 methods from our group as well as others. For instance, treating neurons with the small  
330 molecule inhibitor of dynamin, dynasore, capable of inhibiting endocytosis, did not elicit any  
331 defects in spontaneous neurotransmission although evoked synchronous and asynchronous  
332 transmission showed significant activity-dependent suppression (Chung et al., 2010). Similarly,  
333 the injection of non-hydrolyzable GTP into the calyx of Held synapse revealed an initial block of  
334 synaptic vesicle retrieval that was followed by a resumption of synaptic vesicle endocytosis (Xu  
335 et al., 2008). In addition, a study in salamander retinal cone cells, a tonically active synapse,  
336 revealed no change in endocytosis in the presence of dynamin inhibitors (Van Hook and  
337 Thoreson, 2012). These reports suggest the presence of dynamin-independent endocytosis  
338 mechanisms in neurons contributing to the retrieval of synaptic vesicles from the presynaptic  
339 plasma membrane.

340 Our results suggest that dynamins play a key role in regulation of evoked probability of release

341 and the retrieval of synaptic vesicle components after strong stimulation. In addition to the  
342 decrease in synaptic vesicle numbers, decreased release probability can be a consequence of  
343 limited availability of release sites due to imperfect clearance of fused vesicles during sustained  
344 high frequency activity (Kawasaki et al., 2000; Lou et al., 2012; Hua et al., 2013). Given the  
345 relative sparsity of spontaneous fusion events, the impairments in clearance of release sites  
346 may not present a major impediment for spontaneous fusion propensity. However, it is also  
347 important to note that in the absence of dynamins we did not detect a major impairment in the  
348 kinetic properties of retrieval after single synaptic vesicle fusion events indicating that the  
349 maintenance of spontaneous fusion events cannot solely be explained by their low frequency,  
350 but rather suggest a role for dynamin-independent recycling mechanisms.

351 In this study, we used lentiviral delivery of Cre-recombinase to delete dynamin-1 and dynamin-2  
352 expression on the background of dynamin-3 constitutive knock out neurons. This approach  
353 resulted in swift depletion of dynamins as detected by Western blots as well as quantitative RT-  
354 PCR analysis. This substantial depletion of all dynamin isoforms is consistent with earlier  
355 measurements of dynamin protein lifetime in neurons (Fornasiero et al., 2018). However, we  
356 cannot fully exclude the possibility that some residual dynamins, below our detection, may  
357 contribute to the intact synaptic vesicle trafficking events we detect under these conditions.  
358 Such an effect of residual dynamins would nevertheless suggest a steep functional selectivity of  
359 dynamins depending on their abundance. According to this premise, while ultralow dynamin  
360 levels would be sufficient to maintain quantal synaptic vesicle trafficking, majority of activity  
361 driven synaptic vesicle endocytosis requires high levels of dynamin expression.

362 These results open new critical questions. What are the possible mechanisms that activate this  
363 putative dynamin-independent endocytosis that appears to be specific to single synaptic vesicle  
364 retrieval and spontaneous neurotransmission? How does membrane scission operate without  
365 the perennial pinchase dynamin? Although we do not have answers to these questions at this  
366 time, our findings highlight some possibilities. Our findings using small molecule inhibitors  
367 suggest that actin is not a key player for maintenance of quantal neurotransmission when  
368 dynamins are depleted. Recent studies focusing on the uptake of bacterial Shiga and cholera  
369 toxins, revealed that clathrin-independent endocytic events — that are often less reliant on  
370 dynamin — actually utilize BAR domain proteins such as endophilins for membrane scission  
371 (Renard et al., 2015). Therefore, we cannot exclude the possibility that endophilins such as  
372 endophilin-A2 and the synapse enriched endophilin-A1 (e.g. Llobet et al., 2011) may play critical  
373 roles in dynamin-independent synaptic vesicle retrieval. Overall, future experiments aimed at

374 uncovering the molecular mechanism of single synaptic vesicle retrieval will also help elucidate  
375 the physiological role of this dynamin-independent quantal neurotransmission.

376

377 **Materials and Methods.**

378

379 **KEY RESOURCES TABLE**

| REAGENT or RESOURCE                                               | SOURCE                 | IDENTIFIER               |
|-------------------------------------------------------------------|------------------------|--------------------------|
| <b>Antibodies</b>                                                 |                        |                          |
| Mouse monoclonal anti-Dynamin 1                                   | Abcam                  | Ab13251                  |
| Rabbit polyclonal anti-Dynamin 2                                  | Abcam                  | Ab3457                   |
| Rabbit polyclonal anti-pan Dynamin                                | Liu et al., 2008       | N/A                      |
| Mouse monoclonal anti-Rab-GDI1                                    | Synaptic Systems       | 130 011                  |
| Mouse monoclonal anti-Synapsin                                    | Synaptic Systems       | 106 001                  |
| Mouse monoclonal anti-vGluT                                       | Synaptic Systems       | 135511                   |
| Mouse monoclonal anti-vGAT                                        | Synaptic Systems       | 131011                   |
| <b>Chemicals, Peptides, and Recombinant Proteins</b>              |                        |                          |
| 6-Cyano-7-nitroquinoxaline-2,3-dione disodium salt hydrate (CNQX) | Sigma-Aldrich          | Catalog # C239           |
| D(-)-2-Amino-5-phosphonopentanoic acid (AP-5)                     | Sigma-Aldrich          | Catalog # A8054          |
| Picrotoxin (PTX)                                                  | Sigma-Aldrich          | Catalog # P1675          |
| Tetrodotoxin (TTX)                                                | Enzo Life Sciences     | Catalog # BML-NA120-0001 |
| Latrunculin-A                                                     | Tocris                 | Catalog # 3973           |
| CK-666                                                            | Tocris                 | Catalog # 3950           |
| Mdivi-1                                                           | Sigma-Aldrich          | Catalog # M0199          |
| FM5-95                                                            | Molecular Probes       | Catalog # T23360         |
| <b>Experimental Models: Cell Lines</b>                            |                        |                          |
| Human embryonic kidney-293 (HEK-293) cells                        | ATCC                   | Catalog # CRL-1573       |
| <b>Experimental Models: Organisms/Strains</b>                     |                        |                          |
| Jackson Laboratory fDnm1 Mice                                     | Jackson Laboratory     | 013073                   |
| Jackson Laboratory fDnm2 Mice (P0-P3)                             | Jackson Laboratory     | 013542                   |
| Jackson Laboratory Dnm3 Mice                                      | Jackson Laboratory     | 013543                   |
| <b>Recombinant DNA</b>                                            |                        |                          |
| Plasmid: pRSV-REV (lentiviral packaging)                          | Adgene                 | Catalog # 12253          |
| Plasmid: pCMV-VSV-G (lentiviral packaging)                        | Adgene                 | Catalog # 8454           |
| Plasmid: pMDLg/pRRE (lentiviral packaging)                        | Adgene                 | Catalog # 12251          |
| Plasmid: pFUGW-vGluT1-pHGFP                                       | Voglmaier et al., 2006 | N/A                      |
| Plasmid: L307                                                     |                        | N/A                      |
| Plasmid: Cre recombinase-GFP                                      |                        | N/A                      |
| Plasmid: pFUGW-vGluT1-pHGFP-Cre recombinase                       |                        | N/A                      |
| <b>Sequence-Based Reagents</b>                                    |                        |                          |
| CTACCACAGAATATGCCGAGT                                             | Dnm1 forward           | This paper               |
| ACTGGGACCTTGGTCATTCC                                              | Dnm1 reverse           | This paper               |
| TCACACCTGCCAACATGGAC                                              | Dnm2 forward           | This paper               |
| CGCCGATATAGCCTCTTCTCA                                             | Dnm2 reverse           | This paper               |
| GAATTCGTGGGCAGGGACT                                               | Dnm3 forward           | This paper               |



|                                     |                         |            |
|-------------------------------------|-------------------------|------------|
| TTACGCGGTCTGTTTCTGCT                | Dnm3 reverse            | This paper |
|                                     |                         |            |
|                                     |                         |            |
| Software and Algorithms             |                         |            |
| Matlab script for pHluorin analysis | Chanaday et al., 2018   | N/A        |
| Fiji                                | Schindelin et al., 2012 | N/A        |

380  
381

## 382 ETHICS

383 Animal experimentation: Animal procedures conformed to the Guide for the Care and Use of  
384 Laboratory Animals and were approved by the Institutional Animal Care and Use Committee at  
385 UT Southwestern Medical Center (Animal Protocol Number APN 2016-101416) and at  
386 Vanderbilt University School of Medicine (Animal Protocol Number M1800103).

387

## 388 METHOD DETAILS

### 389 **Lentiviral infection**

390 HEK293 cells (ATCC) were transfected with 3 lentiviral packaging plasmids  
391 (pMDLg/pRRE, pRSV-Rev, and pCMV-VSV-G) and a pFUGW vector containing a Cre-  
392 recombinase and/or vGluT1-pHluorin construct using the Fugene 6 transfection reagent  
393 (Promega). Cell culture supernatants containing the virus were collected 72 hours later and  
394 spun down to precipitate out cellular debris and other contaminants. Neurons were infected at 4  
395 days *in vitro* (DIV) by adding 200  $\mu$ l of virus containing supernatant to the neuronal culture  
396 media.

### 397 **Cell culture**

398 Dissociated hippocampal cultures from postnatal day 0-3  $dnm1^{ff}dnm2^{ff}dnm3$  KO were  
399 prepared as previously described (Kavalali, Klingauf, & Tsien, 1999). Neurons were infected at  
400 4 DIV with lentivirus expressing Cre recombinase or an empty L307 vector for control and  
401 experiments were performed at 17-21 DIV. All experiments were performed following protocols  
402 approved by the University of Texas Southwestern Institutional Animal Care and Use  
403 Committee.

### 404 **Immunocytochemistry**

405 Neuronal cultures were processed for immunocytochemistry as described in Ramirez *et.*



406 *al.* (2008) at 17-19 DIV. Antibodies against dynamin (Synaptic Systems), dynamin 1 (Abcam),  
407 dynamin 2 (Abcam), synapsin, vGlut-1 (Synaptic Systems) and vGAT (Synaptic Systems) were  
408 used at concentrations of 1:500, 1:300, 1:300, 1:1000, 1:500 and 1:500 respectively. Images  
409 were taken on a confocal microscope with a 60X 1.4 NA objective. 8-10 images were taken from  
410 3 coverslips per group. Colocalization analysis was object based and performed using Fiji  
411 software (Schindelin et al. 2012) and a custom made macro.

## 412 **Electron Microscopy**

413 Neuronal cultures were incubated in modified Tyrode's buffer (145 mM NaCl, 4 mM KCl, 2  
414 mM MgCl<sub>2</sub>, 10 mM glucose, 10 mM HEPES, 2 mM CaCl<sub>2</sub>, pH 7.4, osmolarity 310 mOsM) for 2  
415 minutes and then rinsed twice with PBS and then fixed and processed for electron microscopy  
416 by the UTSW Electron Microscopy Core.

## 417 **Western Blot**

418 Neuronal cultures were homogenized processed for western blot as described in  
419 Nosyreva and Kavalali (2010). Antibodies against dynamin (Liu et al., 2008), dynamin 1  
420 (Abcam) and dynamin 2 (Abcam) were used at a 1:1000, 1:3000 and 1:800 dilution respectively  
421 and protein bands were developed using enhanced chemiluminescence (ECL). Bands were  
422 analyzed using ImageJ software and protein levels were normalized to GDI loading control.

## 423 **RNA extraction and quantitative-Reverse Transcriptase (qRT) PCR**

424 To determine relative expression of different dynamin mRNA isoforms after lentivirus  
425 infection, we performed qRT-PCR. RNA from the DIV 19 neuronal cultures were collected by  
426 using PureLink RNA Mini Kit (Ambion, Cat. # 12183018A). Quality and purity of RNA were  
427 confirmed by NanoDrop2000. For cDNA synthesis, we used Invitrogen's SuperScript™ III  
428 Reverse Transcriptase (Cat. #18080-093). Following its first-strand cDNA synthesis protocol, we  
429 used Promega's Oligo(dT)15 (Cat. # C1101) primer and Recombinant RNasin® Ribonuclease  
430 Inhibitor (N2511). cDNA concentration and quality were confirmed by NanoDrop2000 before q-  
431 RT PCR.

432 By following Appliedbiosystems PowerUp™ SYBR™ Green Master Mix (Cat. #A25742)  
433 protocol, transcripts for Dnm1, Dnm2, Dnm3 and Gapdh were amplified in a Stratagene  
434 Mx3005P. Thermal cycling conditions consisted of 1 cycle of 50 °C for 2 m and 95 °C for 2 m, 40  
435 cycles of 95 °C for 15 s, 57 °C for 45s, 72 °C for 60 sec, and 1 dissociation cycle of 95 °C for 15  
436 s, 60 °C for 60 s, 95 °C for 15 s. Respective primers were obtained from Integrated DNA  
437 Technologies: 5'-CTACCACAGAATATGCCGAGT-3' and 5'-ACTGGGACCTTGTCATTCC-3' for

438 Dnm1; 5'-TCACACCTGCCAACATGGAC-3' and 5'-CGCCGATATAGCCTCTTCTCA-3' for Dnm2;  
439 5'-GAATTTTCGTGGGCAGGGACT-3 and 5'-TTACGCGGTCTGTTTCTGCT-3' for Dnm3; 5'-AGG  
440 TCG GTG TGA ACG GAT TTG-3' and 5'-TGT AGA CCA TGT AGT TGA GGT CA-3' for Gapdh.  
441 We calculated relative quantification by using  $2^{-\Delta\Delta Ct}$ . The number 2 in the equation indicates  
442 DNA doubling in each cycle.

### 443 **Electrophysiology**

444 A modified Tyrode's solution was used for all experiments (except where noted  
445 otherwise). Pyramidal neurons were whole-cell voltage clamped at  $-70$  mV with borosilicate  
446 glass electrodes (3-5 M $\Omega$ ) filled with a solution containing (in mM): 105 Cs-methanesulphonate,  
447 10 CsCl, 5 NaCl, 10 HEPES, 20 TEA.Cl hydrate, 4 Mg-ATP, 0.3 GTP, 0.6 EGTA, 10 QX-314 (pH  
448 7.3, osmolarity 300 mOsM). Excitatory-postsynaptic currents (EPSCs) were evoked with 0.1  
449 ms, 10 mA pulses delivered via a bipolar platinum electrode in a modified Tyrode's solution  
450 containing Picrotoxin (PTX, 50  $\mu$ M) and D-2-Amino-5-phosphonovaleric acid (D-APV, 50  $\mu$ M,  
451 NMDA receptor blocker). Spontaneous miniature EPSCs (mEPSCs) were recorded in a  
452 modified Tyrode's solution containing TTX (1  $\mu$ M), PTX (50  $\mu$ M) and D-APV (50  $\mu$ M). Inhibitory-  
453 postsynaptic currents (IPSCs) were evoked with 0.1 ms, 10 mA pulses delivered via a bipolar  
454 platinum electrode in a modified Tyrode's solution containing 6-Cyano-7-nitroquinoxaline-2-3-  
455 dione (CNQX, 10  $\mu$ M, AMPA receptor blocker) and D-APV (50  $\mu$ M). Spontaneous miniature  
456 IPSCs (mIPSCs) were recorded in a modified Tyrode's solution containing TTX (1  $\mu$ M), CNQX  
457 (10  $\mu$ M) and D-APV (50  $\mu$ M). Data was analyzed offline with Clampfit 9 software.

### 458 **Imaging**

459 vGluT1-pHluorin: 17-21 DIV neuronal cultures infected with lentivirus expressing either  
460 vGluT1-pHluorin or vGluT1-pHluorin and Cre recombinase were used for imaging experiments.  
461 Images were taken with an Andor iXon Ultra 897 High Speed Camera (Andor Technology Ltd)  
462 through a Nikon Eclipse TE2000-U Microscope (Nikon) using a 100X Plan Fluor objective  
463 (Nikon). Images were illuminated with a Lambda-DG4 (Sutter instruments) and acquired at  $\sim 7$   
464 Hz with a 120 ms exposure time and binned at 4 by 4 to increase the signal-to-noise ratio.  
465 Images were collected and processed using Nikon Elements Ar software prior to export to  
466 Microsoft excel for analysis. ROIs were randomly selected based on a threshold after treatment  
467 with  $\text{NH}_4\text{Cl}$ .

468 FM5-95 dye: 17-21 DIV hippocampal neuron cultures infected with lentivirus expressing  
469 either Cre-recombinase and GFP or an empty L307 vector were used. Cultures were incubated

470 for 2 minutes in a 45 mM K<sup>+</sup> modified tyrode's solution containing FM5-95 dye at a concentration  
471 of 18μM. Subsequently, excess dye not endocytosed was washed out for 7 minutes with 2 mM  
472 Ca<sup>2+</sup> tyrode's solution and synaptic vesicle release of dye was stimulated by two perfusions of  
473 90 mM K<sup>+</sup> modified tyrode's solution for 90 minutes each separated by a 90 min washing with 2  
474 mM Ca<sup>2+</sup> tyrode solution. Images were captured with a Nikon Eclipse TE2000-U Microscope  
475 (Nikon) using a 40X Fluor objective (Nikon). Images were illuminated with a Lambda-DG4  
476 (Sutter instruments) and acquired at 1 Hz with a 200 ms exposure time. Images were collected  
477 and processed using Nikon Elements Ar software prior to export to Microsoft excel for analysis.  
478 ROIs were randomly selected.

### 479 **Imaging Analysis**

480 vGluT1-pHluorin: Individual synaptic puncta were selected randomly after NH<sub>4</sub>Cl  
481 perfusion and all quenched pHluorin probes were unmasked. Single vesicle events were  
482 analyzed as reported in Leitz et al. (2011) and Chanaday et al. (2018). Dwell times were  
483 calculated as the time between the initial fluorescence step and the start of fluorescence decay  
484 (using the first derivative as parameter). Single vesicle events were analyzed offline with Matlab.  
485 For 20 Hz stimulation, amplitude measurement and single exponential decay fitting (using  
486 Levenberg-Marquardt least sum of squares minimizations) were performed offline in Clampfit.

487 FM dye: Individual puncta were selected randomly after initial washout of excess dye not  
488 endocytosed. Synaptic pool size was estimated by taking the difference of the average  
489 fluorescence of individual puncta prior to 90 mM K<sup>+</sup> stimulation from the average fluorescence at  
490 the end of the second 90 mM K<sup>+</sup> stimulation. The rate of FM dye release was calculated by  
491 fitting the decay in fluorescence in response to the initial 90 mM K<sup>+</sup> tyrode stimulation to a single  
492 exponential decay function using Levenberg-Marquardt least sum of squares minimizations.

### 493 **Statistical Analysis**

494 Statistical analyses were performed with Graphpad Prism 6 software using one of the  
495 following tests: Student's ordinary t-test, Student's paired t-test, Two-way RM ANOVA and  
496 Kolmogorov-Smirnov test. Error bars represent SEM.

497

### 498 **Acknowledgements**

499 We would like to thank Drs. Helmut Kramer (UT Southwestern) and Sandy Schmid (UT  
500 Southwestern) for sharing reagents as well as for their critical insight into this project. This work  
501 was supported by National Institute of Mental Health grants, MH081060 and MH070727 (LMM),

502 and MH66198 (ETK).

503

504 **Competing interests**

505 The authors declare no competing interests.

506

507

508

509 **References**

- 510 Antonny, B., Burd, C., De Camilli, P., Chen, E., Daumke, O., Faelber, K., Ford, M., Frolov, V.A.,  
511 Frost, A., Hinshaw, J.E., et al. (2016). Membrane fission by dynamin: what we know and what  
512 we need to know. *EMBO J* 35, 2270-2284.
- 513 Armbruster, M., Messa, M., Ferguson, S.M., De Camilli, P., and Ryan, T.A. (2013). Dynamin  
514 phosphorylation controls optimization of endocytosis for brief action potential bursts. *Elife* 2,  
515 e00845.
- 516 Artalejo, C.R., Elhamdani, A., and Palfrey, H.C. (2002). Sustained stimulation shifts the  
517 mechanism of endocytosis from dynamin-1-dependent rapid endocytosis to clathrin- and  
518 dynamin-2-mediated slow endocytosis in chromaffin cells. *Proc Natl Acad Sci U S A* 99, 6358-  
519 6363.
- 520 Baldassarre, M., Pompeo, A., Beznoussenko, G., Castaldi, C., Cortellino, S., McNiven, M.A.,  
521 Luini, A., and Buccione, R. (2003). Dynamin participates in focal extracellular matrix degradation  
522 by invasive cells. *Mol Biol Cell* 14, 1074-1084.
- 523 Cao, H., Chen, J., Awoniyi, M., Henley, J.R., and McNiven, M.A. (2007). Dynamin 2 mediates  
524 fluid-phase micropinocytosis in epithelial cells. *Journal of cell science* 120, 4167-4177.
- 525 Chanaday, N.L., and Kavalali, E.T. (2017). How do you recognize and reconstitute a synaptic  
526 vesicle after fusion? *F1000Res* 6, 1734.
- 527 Chanaday, N.L., and Kavalali, E.T. (2018). Optical detection of three modes of endocytosis at  
528 hippocampal synapses. *eLife* 7, pii: e36097.
- 529 Cousin, M.A., and Robinson, P.J. (2000). Ca(2+) influx inhibits dynamin and arrests synaptic  
530 vesicle endocytosis at the active zone. *J Neurosci* 20, 949-957.
- 531 Douthitt, H.L., Luo, F., McCann, S.D., and Meriney, S.D. (2011). Dynasore, an inhibitor of  
532 dynamin, increases the probability of transmitter release. *Neuroscience* 172, 187-195.
- 533 Evergren, E., Zotova, E., Brodin, L., and Shupliakov, O. (2006). Differential efficiency of the  
534 endocytic machinery in tonic and phasic synapses. *Neuroscience* 141, 123-131.
- 535 Fan, F., Funk, L., and Lou, X. (2016). Dynamin 1- and 3-Mediated Endocytosis Is Essential for  
536 the Development of a Large Central Synapse In Vivo. *J Neurosci* 36, 6097-6115.
- 537 Ferguson, S.M., Brasnjo, G., Hayashi, M., Wolfel, M., Collesi, C., Giovedi, S., Raimondi, A.,  
538 Gong, L.W., Ariel, P., Paradise, S., et al. (2007). A selective activity-dependent requirement for  
539 dynamin 1 in synaptic vesicle endocytosis. *Science* 316, 570-574.
- 540 Ferguson, S.M., and De Camilli, P. (2012). Dynamin, a membrane-remodelling GTPase. *Nat*  
541 *Rev Mol Cell Biol* 13, 75-88.
- 542 Fornasiero, E.F., Mandad, S., Wildhagen, H., Alevra, M., Rammner, B., Keihani, S., Opazo, F.,  
543 Urban, I., Ischebeck, T., Sakib, M.S., Fard, M.K., Kirli, K., Centeno, T.P., Vidal, R.O., Rahman,  
544 R.U., Benito, E., Fischer, A., Dennerlein, S., Rehling, P., Feussner, I., Bonn, S., Simons, M.,  
545 Urlaub, H., and Rizzoli, S.O. (2018). Precisely measured protein lifetimes in the mouse brain  
546 reveal differences across tissues and subcellular fractions. *Nat Commun.* 9, 4230.
- 547 Gold, E.S., Underhill, D.M., Morrisette, N.S., Guo, J., McNiven, M.A., and Aderem, A. (1999).  
548 Dynamin 2 is required for phagocytosis in macrophages. *J Exp Med* 190, 1849-1856.
- 549 Grassart, A., Cheng, A.T., Hong, S.H., Zhang, F., Zenzer, N., Feng, Y., Briner, D.M., Davis, G.D.,  
550 Malkov, D., and Drubin, D.G. (2014). Actin and dynamin2 dynamics and interplay during  
551 clathrin-mediated endocytosis. *J Cell Biol* 205, 721-735.

- 552 Hua, Y., Woehler, A., Kahms, M., Haucke, V., Neher, E., and Klingauf, J. (2013). Blocking  
553 endocytosis enhances short-term synaptic depression under conditions of normal availability of  
554 vesicles. *Neuron* 80, 343-349.
- 555 Kavalali, E.T., and Jorgensen, E.M. (2014). Visualizing presynaptic function. *Nat Neurosci* 17,  
556 10-16.
- 557 Kawasaki, F., Hazen, M., and Ordway, R. W. (2000). Fast synaptic fatigue in shibire mutants  
558 reveals a rapid requirement for dynamin in synaptic vesicle membrane trafficking. *Nat. Neurosci.*  
559 3, 859–860.
- 560 Koenig, J.H., and Ikeda, K. (1989). Disappearance and reformation of synaptic vesicle  
561 membrane upon transmitter release observed under reversible blockage of membrane retrieval.  
562 *J Neurosci* 9, 3844-3860.
- 563 Lee, E., and De Camilli, P. (2002). Dynamin at actin tails. *Proc Natl Acad Sci U S A* 99, 161-166.
- 564 Leitz, J., and Kavalali, E.T. (2011). Ca<sup>2+</sup>(+) influx slows single synaptic vesicle endocytosis. *J*  
565 *Neurosci* 31, 16318-16326.
- 566 Li, Y.C., Chanaday, N.L., Xu, W., and Kavalali, E.T. (2017). Synaptotagmin-1- and  
567 Synaptotagmin-7-Dependent Fusion Mechanisms Target Synaptic Vesicles to Kinetically Distinct  
568 Endocytic Pathways. *Neuron* 93, 616-631 e613.
- 569 Linares-Clemente, P., Rozas, J.L., Mircheski, J., Garcia-Junco-Clemente, P., Martinez-Lopez,  
570 J.A., Nieto-Gonzalez, J.L., Vazquez, M.E., Pintado, C.O., and Fernandez-Chacon, R. (2015).  
571 Different dynamin blockers interfere with distinct phases of synaptic endocytosis during  
572 stimulation in motoneurons. *J Physiol* 593, 2867-2888.
- 573 Liu, Y.W., Surka, M.C., Schroeter, T., Lukiyanchuk, V., and Schmid, S.L. (2008). Isoform and  
574 splice-variant specific functions of dynamin-2 revealed by analysis of conditional knock-out cells.  
575 *Mol Biol Cell* 19, 5347-5359.
- 576 Llobet, A., Gallop, J.L., Burden, J.J.E., Çamdere, G., Chandra, P., Vallis, Y., Hopkins, C.R.,  
577 Lagnado, L., and McMahon, H.T. (2011). Endophilin drives the fast mode of vesicle retrieval in a  
578 ribbon synapse. *J Neurosci.* 31, 8512-8519.
- 579 Lou, X., Fan, F., Messa, M., Raimondi, A., Wu, Y., Looger, L.L., Ferguson, S.M., and De Camilli,  
580 P. (2012). Reduced release probability prevents vesicle depletion and transmission failure at  
581 dynamin mutant synapses. *Proc Natl Acad Sci U S A* 109, E515-523.
- 582 McAdam, R.L., Varga, K.T., Jiang, Z., Young, F.B., Blandford, V., McPherson, P.S., Gong, L.W.,  
583 and Sossin, W.S. (2015). The juxtamembrane region of synaptotagmin 1 interacts with dynamin  
584 1 and regulates vesicle fission during compensatory endocytosis in endocrine cells. *Journal of*  
585 *cell science* 128, 2229-2235.
- 586 McCluskey, A., Daniel, J.A., Hadzic, G., Chau, N., Clayton, E.L., Mariana, A., Whiting, A.,  
587 Gorgani, N.N., Lloyd, J., Quan, A., et al. (2013). Building a better dynasore: the dyngo  
588 compounds potently inhibit dynamin and endocytosis. *Traffic* 14, 1272-1289.
- 589 Min, L., Leung, Y.M., Tomas, A., Watson, R.T., Gaisano, H.Y., Halban, P.A., Pessin, J.E., and  
590 Hou, J.C. (2007). Dynamin is functionally coupled to insulin granule exocytosis. *J Biol Chem*  
591 282, 33530-33536.
- 592 Orth, J.D., Krueger, E.W., Cao, H., and McNiven, M.A. (2002). The large GTPase dynamin  
593 regulates actin comet formation and movement in living cells. *Proc Natl Acad Sci U S A* 99, 167-  
594 172.



595 Park, R.J., Shen, H., Liu, L., Liu, X., Ferguson, S.M., and De Camilli, P. (2013). Dynamin triple  
596 knockout cells reveal off target effects of commonly used dynamin inhibitors. *Journal of cell*  
597 *science* 126, 5305-5312.

598 Raimondi, A., Ferguson, S.M., Lou, X., Armbruster, M., Paradise, S., Giovedi, S., Messa, M.,  
599 Kono, N., Takasaki, J., Cappello, V., et al. (2011). Overlapping role of dynamin isoforms in  
600 synaptic vesicle endocytosis. *Neuron* 70, 1100-1114.

601 Renard, H.F., Simunovic, M., Lemière, J., Boucrot, E., Garcia-Castillo, M.D., Arumugam, S.,  
602 Chambon, V., Lamaze, C., Wunder, C, Kenworthy, A.K., Schmidt, A.A., McMahon, H.T., Sykes,  
603 C., Bassereau, P., and Johannes, L. (2015). Endophilin-A2 functions in membrane scission in  
604 clathrin-independent endocytosis. *Nature*. 517, 493-496.

605 Rikhy, R., Kamat, S., Ramagiri, S., Sriram, V., and Krishnan, K.S. (2007). Mutations in dynamin-  
606 related protein result in gross changes in mitochondrial morphology and affect synaptic vesicle  
607 recycling at the *Drosophila* neuromuscular junction. *Genes Brain Behav* 6, 42-53.

608 Saheki, Y., and De Camilli, P. (2012). Synaptic vesicle endocytosis. *Cold Spring Harb Perspect*  
609 *Biol* 4, a005645.

610 Schindelin J1, Arganda-Carreras I, Frise E, Kaynig V, Longair M, Pietzsch T, Preibisch S,  
611 Rueden C, Saalfeld S, Schmid B, Tinevez JY, White DJ, Hartenstein V, Eliceiri K, Tomancak P,  
612 Cardona A. (2012). Fiji: an open-source platform for biological-image analysis. *Nat Methods*.  
613 2012 Jun 28;9(7):676-82.

614 Schlunck, G., Damke, H., Kiosses, W.B., Rusk, N., Symons, M.H., Waterman-Storer, C.M.,  
615 Schmid, S.L., and Schwartz, M.A. (2004). Modulation of Rac localization and function by  
616 dynamin. *Mol Biol Cell* 15, 256-267.

617 Soykan, T., Maritzen, T., and Haucke, V. (2016). Modes and mechanisms of synaptic vesicle  
618 recycling. *Curr Opin Neurobiol* 39, 17-23.

619 Swadlow, H.A. (2003). Fast-spike interneurons and feedforward inhibition in awake sensory  
620 neocortex. *Cereb Cortex* 13, 25-32.

621 Tanifuji, S., Funakoshi-Tago, M., Ueda, F., Kasahara, T., and Mochida, S. (2013). Dynamin  
622 isoforms decode action potential firing for synaptic vesicle recycling. *J Biol Chem* 288, 19050-  
623 19059.

624 Voglmaier, S.M., Kam, K., Yang, H., Fortin, D.L., Hua, Z., Nicoll, R.A., and Edwards, R.H.  
625 (2006). Distinct endocytic pathways control the rate and extent of synaptic vesicle protein  
626 recycling. *Neuron* 51, 71-84.

627 Watanabe, S., Rost, B.R., Camacho-Perez, M., Davis, M.W., Sohl-Kielczynski, B., Rosenmund,  
628 C., and Jorgensen, E.M. (2013). Ultrafast endocytosis at mouse hippocampal synapses. *Nature*  
629 504, 242-247.

630 Wu, X.S., Lee, S.H., Sheng, J., Zhang, Z., Zhao, W.D., Wang, D., Jin, Y., Charnay, P., Ervasti,  
631 J.M., and Wu, L.G. (2016). Actin Is Crucial for All Kinetically Distinguishable Forms of  
632 Endocytosis at Synapses. *Neuron* 92, 1020-1035.

633 Xu, J., McNeil, B., Wu, W., Nees, D., Bai, L., and Wu, L.G. (2008). GTP-independent rapid and  
634 slow endocytosis at a central synapse. *Nat Neurosci* 11, 45-53.

635  
636

637 **Figure Legends**

638

639 **Figure 1**

640 **A.** Representative Western blot (top) and quantification (bottom) of dynamin 2 levels in control  
641 (left bands) and dynamin 2 KO (right bands) neurons. There is ~93% reduction in dynamin 2  
642 protein levels at 18-20 DIV.

643 **B.** Example traces of normalized vGluT1-pHluorin responses to 20 Hz 100 AP (5 s) stimulation  
644 in control (WT, black) and dynamin 2 KO (red) hippocampal neuron cultures.

645 **C.** Cumulative distribution of the calculated fluorescence decay time constant ( $\tau$ ). Decay time  
646 courses are fit with a single exponential function for control (WT, black) and dynamin 2 KO (red)  
647 neuronal cultures. WT: N=399 boutons; dynamin 2 KO: N=340 boutons. Inset: Average  $\tau$  for WT  
648 (black) and dynamin 2 KO (red) neurons ( $p=0.4081$  by Student's ordinary t-test).

649 **D.** Representative eEPSC traces from WT littermate controls (black) and dynamin 2 KO (red)  
650 cultured hippocampal neurons.

651 **E.** Average eEPSC amplitudes from WT (N=10, mean=1.5 nA) and dynamin 2 KO (N=9,  
652 mean=1.3 nA) neurons are similar.

653 **F.** Sample eEPSC traces of the first 8 responses from WT (black) and dynamin 2 KO (red)  
654 neurons to 400 stimuli applied at a 10 Hz frequency.

655 **G.** Normalized responses from WT (black, N=10) and dynamin 2 KO (red, N=9) neurons after  
656 400 pulses 10 Hz stimuli showing no effect of the absence of dynamin 2 on synaptic  
657 transmission.

658 **H.** Representative Western blot (top) and quantification (bottom) of total dynamin (using a pan-  
659 dynamin antibody) depicting the loss of all three dynamin isoforms (Cre treated cultures,  
660 orange) compared to littermate controls (empty L307 vector, blue). There is a substantial  
661 (~93%) reduction of dynamins 1, 2 and 3 after 15 DIV in cultured hippocampal neurons.

662 **I.** Sample electron micrograph images of Dnm 3 KO and Dnm TKO synapses. White arrows:  
663 docked synaptic vesicles. Black bars = 200  $\mu\text{m}$ .

664 **J.** Total number of synaptic vesicles (SV) per presynaptic area in Dnm 3 KO (blue, N=41  
665 synapses, mean=65 SVs) and Dnm TKO synapses (orange, N=53 synapses, mean=47 SVs; \*  
666  $p=0.0193$  by Student's ordinary t-test).

667 **K.** Number of docked synaptic vesicles in Dnm 3 KO (blue, N=22 synapses, mean=3 SVs) and  
668 Dnm TKO synapses (orange, N=19 synapses, mean=1.5 SVs; \*\*  $p=0.0039$  by Student's  
669 ordinary t-test). These results show a significant reduction in the sizes of the total pool and the  
670 readily releasable pool of synaptic vesicles after depletion of all dynamin isoforms.

671 **L.** Representative immunofluorescence images from Dnm 3 KO and Dnm TKO neurites stained  
672 against vGAT (top panels) and vGluT1 (bottom panels). White bars= 2  $\mu\text{m}$ .

673 **M.** Average number of inhibitory presynaptic boutons (vGAT positive) per  $\mu\text{m}^2$  in Dnm 3 KO  
674 (blue, N=10 images from 3 coverslips) and Dnm TKO cultures (orange, N=9 images from 3  
675 coverslips).

676 **N.** Average number of excitatory presynaptic boutons (vGluT1 positive) per  $\mu\text{m}^2$  in Dnm 3 KO  
677 (blue, N=8 images from 2 coverslips) and Dnm TKO cultures (orange, N=6 images from 2  
678 coverslips).

679

680 **Figure 2**



681 **A.** Sample vGluT1-pHluorin traces in Dnm 3 KO (blue) and Dnm TKO (orange) boutons in  
682 response to 20 Hz 100 AP (5 s) stimulation ( $\Delta F$ ) and after perfusion of 20 mM  $\text{NH}_4\text{Cl}$  ( $F_{\text{NH}_4\text{Cl}}$ ).  
683 **B.** Percent distribution of the different retrieval types observed in Dnm TKO neurons following  
684 20 Hz stimulation. 63% of Dnm TKO boutons decayed back to at least 70% of the initial  
685 increase in fluorescence ( $\Delta F$ ) indicating high (similar to control) retrieval of the fused synaptic  
686 vesicle proteins. 25% of Dnm TKO synapses had obstructed endocytosis since they decayed to  
687 less than 20% of the initial increase in fluorescence while the remaining 12% of Dnm TKO  
688 synapses showed partial variable efficiency in retrieval with decays between 20% - 70% of the  
689 initial increase in fluorescence.  
690 **C.** Cumulative histogram of vGluT1-pHluorin retrieval (% of  $\Delta F_{\text{ret}}/\Delta F$ ) after 20 Hz 100 AP  
691 stimulation for Dnm 3 KO (blue, N=1885 boutons) and Dnm TKO (orange, N=967 boutons)  
692 showing an impairment in retrieval efficiency in the absence of all dynamin isoforms ( $p < 0.0001$ ,  
693 Kolmogorov-Smirnov test).  
694 **D.** Cumulative distribution of response amplitudes ( $\Delta F$  relative to  $F_{\text{NH}_4\text{Cl}}$ ) after 20 Hz 100 AP  
695 stimulation for Dnm 3 KO (blue, N=1885 boutons) and Dnm TKO (orange, N=967 boutons)  
696 revealing a decrease of exocytosis in the absence of all dynamin isoforms ( $p < 0.0001$ ,  
697 Kolmogorov-Smirnov test).  
698 **E.** Cumulative distribution of calculated decay time constant ( $\tau$ ) for Dnm 3 KO (blue, mean=85 s)  
699 and Dnm TKO (orange, mean=137 s) showing a slowdown in endocytosis in neurons lacking  
700 dynamins 1, 2 and 3 ( $p < 0.0001$ , Kolmogorov-Smirnov test).  
701 **F.** Top: outline of FM dye release experiment. Synapses were preloaded with FM dye by  
702 incubating cultures in 45 mM KCl modified Tyrode's buffer containing 18  $\mu\text{M}$  FM5-95. Release  
703 of dye was induced by incubating cultures in 90 mM KCl modified Tyrode's buffer. Bottom:  
704 Average normalized  $\Delta F$  response in Dnm 3 KO (blue, N=5 coverslips) and Dnm TKO (orange,  
705 N=5 coverslips) synapses after two successive stimulations with 90 mM KCl to induce release of  
706 FM5-95.  
707 **G.** Cumulative distribution of the total change in fluorescence ( $\Delta F$ ) after 2 cycles of 90 mM KCl  
708 stimulation and FM5-95 dye release in Dnm 3 KO (blue) and Dnm TKO (orange) synapses  
709 showing a significant decrease in exocytosis in the absence of dynamins (\*\* $p < 0.0001$ ,  
710 Kolmogorov-Smirnov test). Inset: average values of  $\Delta F$  after 2 cycles of 90 mM KCl stimulation.  
711 **H.** Cumulative histogram of the decay time constant ( $\tau$ ) from fitting FM5-95 fluorescence decay  
712 after the first 90 mM KCl stimulation, in Dnm 3 KO (blue) and Dnm TKO (orange) presynaptic  
713 boutons showing a slowdown in the kinetics of exocytosis in neurons lacking all dynamin  
714 isoforms (\*\* $p < 0.0001$  by Kolmogorov-Smirnov test). Inset: average  $\tau$  values.  
715 **I.** Analysis of single vesicle fusion events in Dnm 3 KO synapses. Top: two representative single  
716 vesicle fusion events monitored with vGluT1-pHluorin (black lines show the dwell time and the  
717 subsequent exponential decay of fluorescence). Bottom: average of all single vesicle event  
718 traces fitted with a double exponential decay (black line) revealing the two components of  
719 endocytosis (ultrafast  $\sim 360$  ms; fast  $\sim 8.1$  s).  
720 **J.** Analysis of single vesicle fusion events in Dnm TKO synapses. Top: two representative single  
721 vesicle fusion events monitored with vGluT1-pHluorin (black lines show the dwell time and the  
722 subsequent exponential decay of fluorescence). Bottom: average of all single vesicle event  
723 traces fitted with a double exponential decay (black line) revealing the two components of  
724 endocytosis (ultrafast  $\sim 360$  ms; fast  $\sim 6.7$  s). There is not a major impact of removal of all

725 dynamin isoforms in the kinetics of single synaptic vesicle retrieval and reacidification during low  
726 frequency stimulation.

727 **K.** Cumulative histogram of amplitudes for single synaptic vesicle fusion events in Dnm 3 KO  
728 (blue, N=1565 boutons) and Dnm TKO (orange, N=961 boutons) show a similar distribution  
729 between both groups. Inset: average amplitude ( $\Delta F$ ) for Dnm 3 KO (blue, mean=82.2 a.u.) and  
730 Dnm TKO (orange, mean=83.0 a.u.,  $p=0.9137$  by Kolmogorov-Smirnov test).

731 **L.** Cumulative distribution of dwell times for Dnm 3 KO (blue, N=1565 boutons) and Dnm TKO  
732 (orange, N=961 boutons). The lack of all three dynamin isoforms does not impact the kinetics of  
733 single synaptic vesicle endocytosis. Inset: frequency histogram of dwell time duration for each  
734 experimental group ( $p=0.06752$  by Kolmogorov-Smirnov test).

735 **M.** Classification of dwell times into three categories: Rapid decay ( $<1$  s dwell), Short decay (1 –  
736 10 s dwell) and Long dwell ( $> 10$  s dwell). The fraction of total measured dwell times into each  
737 category are shown for Dnm 3 KO (blue) and Dnm TKO (orange), showing no differences in the  
738 proportion of fast or slow endocytic events between the groups. When only events from  
739 synapses with defects in endocytosis after high frequency stimulation (yellow traces in B, yellow  
740 bars in M) were considered for the analysis, no significant defects in dwell times (single synaptic  
741 vesicle endocytosis) were observed (yellow).

742

### 743 **Figure 3**

744 **A.** Analysis of single vesicle fusion events in Dnm 3 KO synapses at extracellular 8 mM  $Ca^{2+}$   
745 concentration. Top: two representative single vesicle fusion events (blue) monitored with vGluT1-  
746 pHluorin (black lines show the dwell time and the subsequent exponential decay of fluorescence).  
747 Bottom: average of all single vesicle event traces fitted with a double exponential decay (blue line)  
748 revealing the two components of endocytosis (ultrafast  $\sim 310$  ms; fast  $\sim 19$  s; N=888 boutons).

749 **B.** Analysis of single vesicle fusion events in Dnm TKO synapses at extracellular 8 mM  $Ca^{2+}$   
750 concentration. Top: two representative single vesicle fusion events (orange) monitored with vGluT1-  
751 pHluorin (black lines show the dwell time and the subsequent exponential decay of fluorescence).  
752 Bottom: average of all single vesicle event traces fitted with a double exponential decay (orange line)  
753 revealing the two components of endocytosis (ultrafast  $\sim 260$  ms; fast  $\sim 19$  s; N=226 boutons). There  
754 is not a major impact of removal of all dynamin isoforms in the kinetics of single synaptic vesicle  
755 retrieval and reacidification during low frequency stimulation. Moreover, in the absence of dynamins  
756 the  $Ca^{2+}$ -dependent slowdown of endocytosis occurs normally.

757 **C.** Cumulative distribution of single vesicle event amplitudes from Dnm 3 KO (blue, N=888 boutons)  
758 and Dnm TKO (orange, N=226 boutons) synapses in 8mM  $Ca^{2+}$ . Inset: Average amplitude for Dnm 3  
759 KO (blue, mean=83.0 a.u.) and Dnm TKO (orange, mean=81.2 a.u.,  $p=0.8619$  by Kolmogorov-  
760 Smirnov test) are similar between the two experimental groups.

761 **D.** Cumulative distribution of single vesicle event dwell times from Dnm 3 KO (blue, N=888 boutons)  
762 and Dnm TKO (orange, N=226 boutons) synapses in extracellular 8mM  $Ca^{2+}$ . There is no effect in  
763 the kinetics of single synaptic vesicle endocytosis after removal of all dynamin isoforms. Inset:  
764 Histograms of dwell time duration for both experimental groups ( $p=0.1149$  by Kolmogorov-Smirnov  
765 test).

766

### 767 **Figure 4**

768 **A.** Left, sample eIPSC traces after a single stimulus from littermate control Dnm 3 KO (blue) and  
769 Dnm TKO (orange) neurons. Right, average eIPSC amplitudes of littermate control Dnm 3 KO

770 (blue, mean=1.4 nA, N=31) and Dnm TKO (orange, mean =0.8 nA, N=27) hippocampal neuron  
771 cultures (\*\* p = 0.0172, Student's ordinary t-test). There is a decrease in amplitude in Dnm TKO  
772 neurons indicating a reduction in release probability.

773 **B.** Representative traces of the first 8 eIPSC responses to a 1 Hz 30 AP stimulus for Dnm 3 KO  
774 (blue) and Dnm TKO (orange).

775 **C.** Normalized eIPSC amplitudes after 1 Hz 30 AP stimulus for Dnm 3 KO (blue, N=9) and Dnm  
776 TKO (orange, N=12) showing no differences between the groups (p=0.9917, Two-way RM  
777 ANOVA).

778 **D.** Sample traces of the first 13 eIPSC responses to a 10 Hz 400 AP stimulus for Dnm 3 KO  
779 (blue) and Dnm TKO (orange) neurons.

780 **E.** Normalized eIPSC amplitudes after 10 Hz 400 AP stimulus for Dnm 3 KO (blue, N=8) and  
781 Dnm TKO (orange, N=12) revealing similar depression time course for both groups (p=0.7167,  
782 Two-way RM ANOVA).

783 **F.** Top: sample traces of the first 10, middle 12 and last 12 eIPSC responses to a 30 Hz 1000 AP  
784 stimulus for Dnm 3 KO (blue) and Dnm TKO (orange). Bottom: normalized eIPSC amplitudes  
785 after 30 Hz 1000 AP stimulus for Dnm 3 KO (blue, N=11) and Dnm TKO (orange, N=7). There is  
786 a facilitation of release at the beginning of the stimulation train in Dnm TKO indicative of  
787 reduced release probability in this group (p=0.0017, Two-way RM ANOVA).

788 **G.** Representative mIPSC recordings from Dnm 3 KO (blue) and Dnm TKO (orange) neurons.

789 **H.** Average mIPSC frequency for Dnm 3 KO (blue, N=10, mean=1.8 Hz) and Dnm TKO (orange,  
790 N=11, mean=1.4 Hz) hippocampal neuron cultures reveals no effect on the rate of inhibitory  
791 spontaneous neurotransmitter release after depletion of all dynamins (p=0.6636, Student's  
792 ordinary t-test).

793 **I.** Cumulative distribution of the mIPSC amplitudes for Dnm 3 KO (orange) and Dnm TKO (blue)  
794 showing a small but significant reduction in amplitudes (p<0.0001, Kolmogorov Smirnov test).

795

## 796 **Figure 5**

797 **A.** Sample eEPSC traces after a single stimulus from littermate control Dnm 3 KO (blue) and  
798 Dnm TKO (orange) neurons. Inset: Average eEPSC amplitudes of littermate control Dnm 3 KO  
799 (blue, mean=1.2 nA, N=10) and Dnm TKO (orange, mean=0.1 nA, N=10) neuronal cultures  
800 revealing a severe reduction in release probability at excitatory synapses (\* p=0.0003, Student's  
801 ordinary t-test).

802 **B.** Representative traces of the first 7 eEPSC responses to a 1 Hz 30 AP stimulus for Dnm 3 KO  
803 (blue) and Dnm TKO (orange). Arrows indicate application of stimulus, note the abnormal  
804 presence of failures in Dnm TKO trace.

805 **C.** Normalized eEPSC amplitudes after 1 Hz 30 AP stimulus for Dnm 3 KO (blue, N=10) and  
806 Dnm TKO (orange, N=10) showing facilitation in Dnm TKO consistent with reduced release  
807 probability (p = 0.0064, Two-way RM ANOVA).

808 **D.** Sample traces of the first 13 eEPSC responses to a 10 Hz 400 AP stimulus for Dnm 3 KO  
809 (blue) and Dnm TKO (orange).

810 **E.** Normalized eEPSC amplitudes after 10 Hz 400 AP stimulus for Dnm 3 KO (blue, N=7) and  
811 Dnm TKO (orange, N=8), depletion of all dynamin isoforms has a severe negative effect in the  
812 probability of release at excitatory synapses (p = 0.0182, Two-way RM ANOVA).

813 **F.** Representative mEPSC recordings from Dnm 3 KO (blue) and Dnm TKO (orange) neurons.

814 **G.** Average mEPSC frequency for Dnm 3 KO (blue, N=10, mean=1.74 Hz) and Dnm TKO  
815 (orange, N=11, mean=0.76 Hz) hippocampal neuron cultures revealing a >2-fold reduction in the  
816 rate of spontaneous release (\* p=0.0353, Student's ordinary t-test).

817 **H.** Cumulative distribution of mEPSC amplitudes for Dnm 3 KO (blue) and Dnm TKO (orange)  
818 showing no significant difference between the groups (p<0.0001, Kolmogorov-Smirnov test).

819

820 **Figure 6.**

821 **A.** Sample mEPSC traces from Dnm TKO hippocampal neuron cultures recorded before  
822 (orange) and after (pink) treatment with Latrunculin A (20  $\mu$ M), CK-666 (200  $\mu$ M) and Mdivi-1 (50  
823  $\mu$ M).

824 **B.** Average mEPSC frequency from Dnm TKO neurons before (orange) and after (pink)  
825 treatment with Latrunculin A (N=9, p=0.4856, Student's paired t-test), CK-666 (N=6, p=0.7339,  
826 Student's paired t-test) and Mdivi-1 (N=8, p=0.3597, Student's paired t-test). Actin dynamics,  
827 Arp2/3 and the mitochondrial dynamin-related protein (DRP) do not mediate the remaining  
828 excitatory neurotransmission after depletion of all dynamin isoforms.

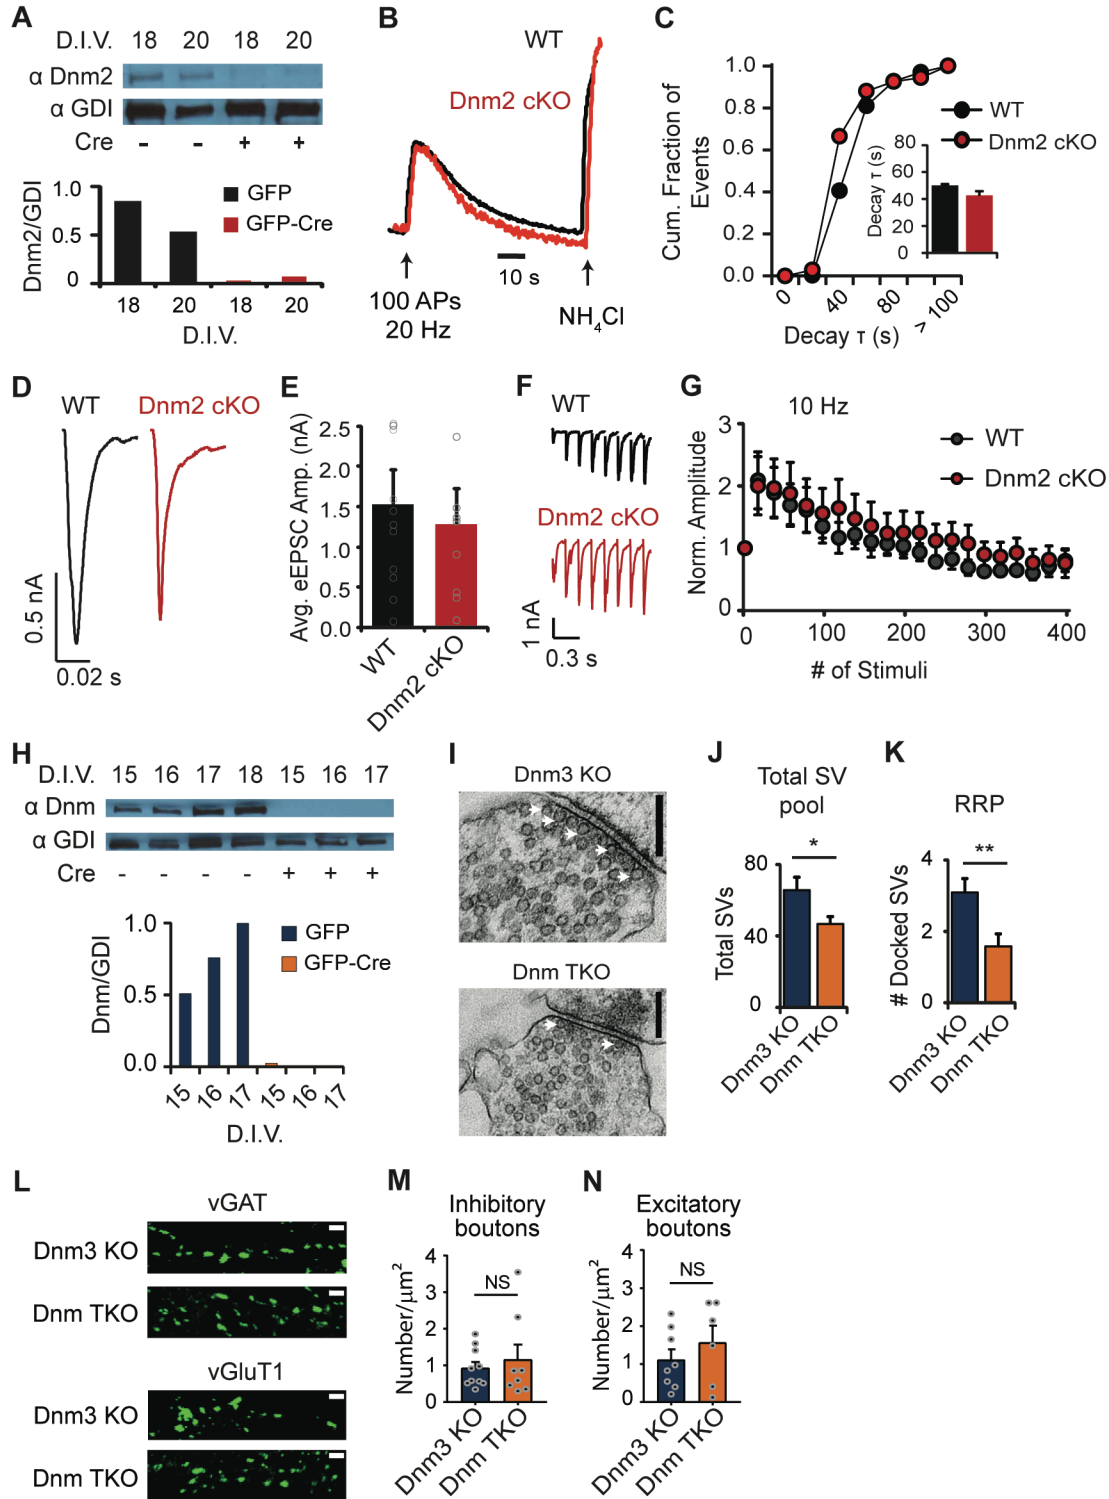

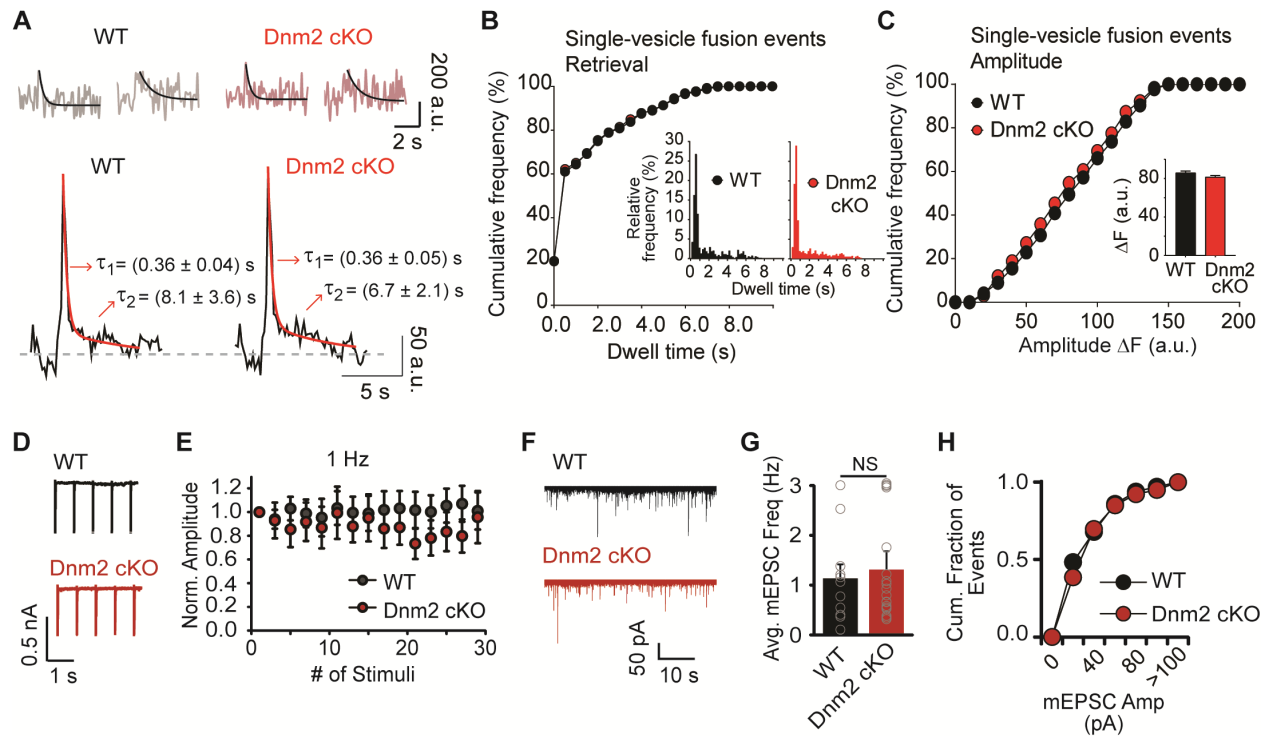

**Figure 1 – figure supplement 1.**

**A.** Analysis of single vesicle fusion events in Dnm 2 KO synapses at extracellular 2 mM  $\text{Ca}^{2+}$  concentration. Top: two representative single vesicle fusion events monitored with vGluT1-pHluorin for control (WT, grey) and Dnm 2 KO (pink; black lines show the exponential decay of fluorescence after fusion). Bottom: average of all single vesicle event traces for WT (left) and Dnm 2 KO (right) fitted with a double exponential decay (red line) revealing the two components of endocytosis (ultrafast  $\sim 360$  ms; fast  $\sim 6$ -8 s). There is not a major impact of removal of Dnm 2 in the kinetics of single synaptic vesicle retrieval and reacidification during low frequency stimulation.

**B.** Cumulative distribution of single vesicle event dwell times from WT control (black, N=429 boutons) and Dnm 2 KO (red, N=489 boutons) synapses. There is no effect in the kinetics of single synaptic vesicle endocytosis after removal of Dnm 2. Inset: Histograms of dwell time duration for both experimental groups ( $p=0.1391$  by Kolmogorov-Smirnov test).

**C.** Cumulative distribution of single vesicle event amplitudes from WT control (black, N=429 boutons) and Dnm 2 KO (red, N=489 boutons) synapses. Inset: Average amplitude for WT (black, mean=86.1 a.u.) and Dnm 2 KO (red, mean=81.7 a.u.,  $p=0.8130$  by Kolmogorov-Smirnov test) presynaptic terminals.

**D.** Sample traces of the first 5 responses from WT (black) and Dnm 2 KO (red) neurons to 30 stimuli applied at a 1 Hz frequency.

**E.** Normalized responses from WT (black, N=10) and Dnm 2 KO (red, N=9) cultured hippocampal neurons after 1 Hz 30 AP stimulation are similar for both groups ( $p=0.4385$ , Two-way RM ANOVA).

**F.** Representative mEPSC traces from WT (black) and Dnm 2 KO (red) hippocampal neuron cultures.



**G.** Average mEPSC frequency for WT (black, N=11, mean=1.1 Hz) and Dnm 2 KO (red, N=15; mean=1.3 Hz) neurons showing no effect of the loss of dynamin 2 on presynaptic spontaneous release rate (p=0.7500, Student's ordinary t-test).

**H.** Cumulative distribution of mEPSC amplitude from WT (black) and Dnm 2 KO (red) neuronal cultures.

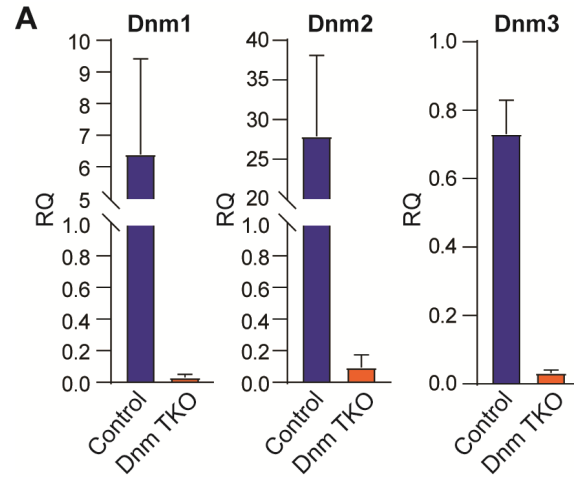

**Figure 1 – figure supplement 2.**

**A.** qRT-PCR of dynamins' mRNAs in cultured hippocampal neurons from Dnm TKO and littermate controls (controls were floxed Dnm1/2, Dnm3 heterozygous animals incubated with lentivirus expressing only GFP). Data comes from 2 independent cultures at DIV 19, each group was measured by triplicate.



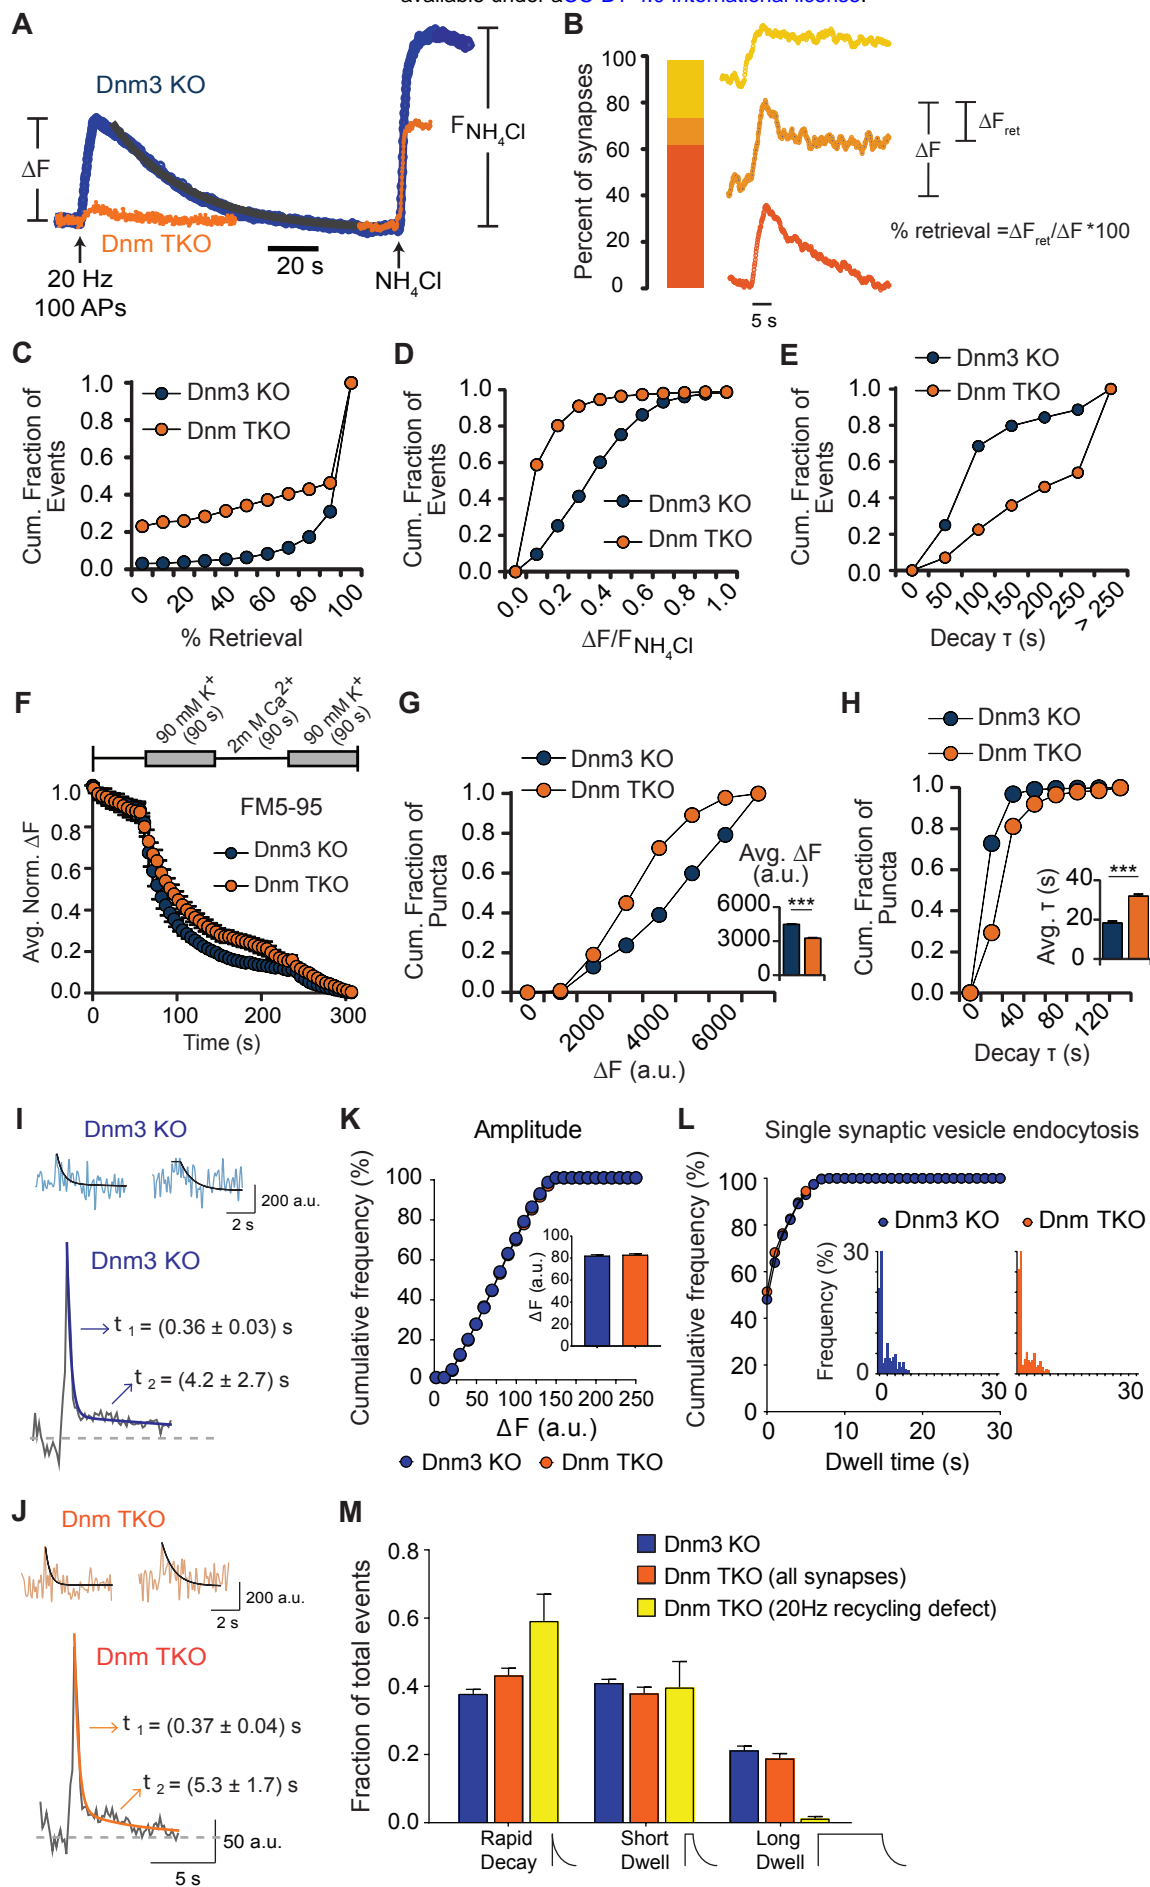

Single synaptic vesicle fusion events at 8 mM extracellular  $\text{Ca}^{2+}$

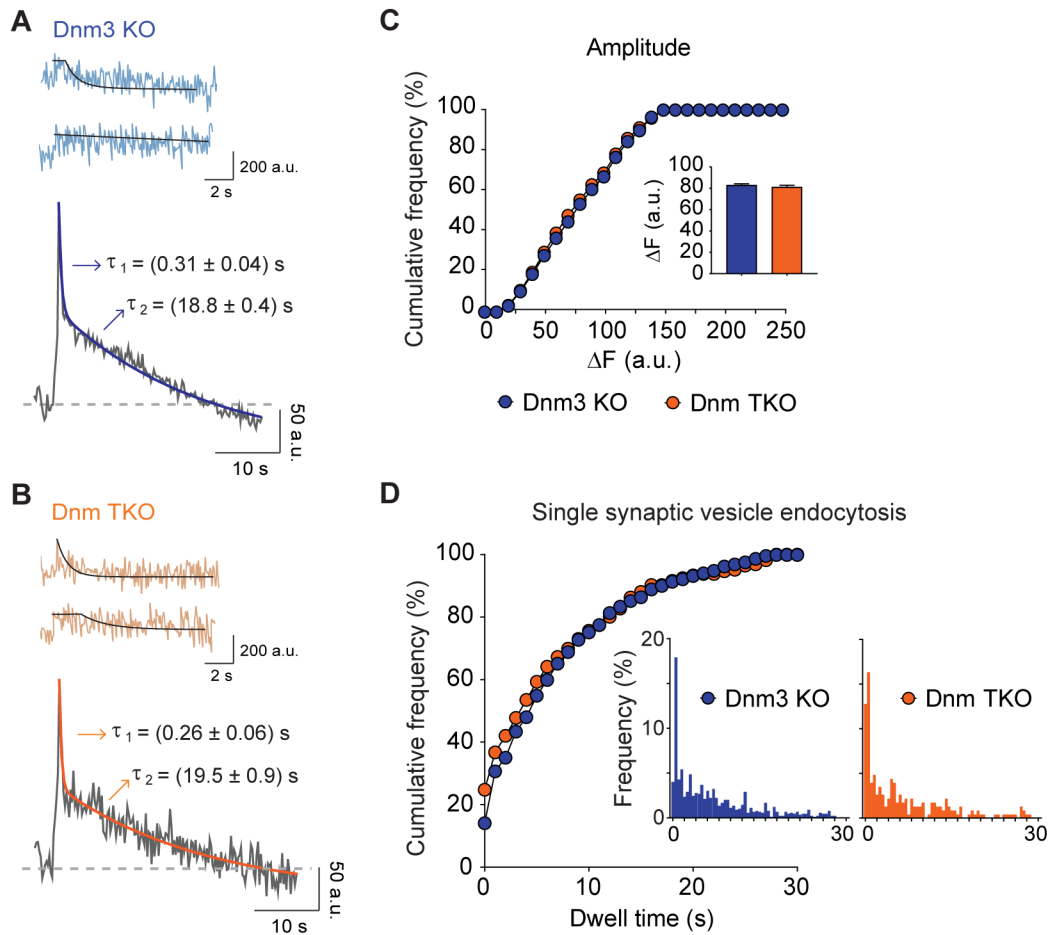

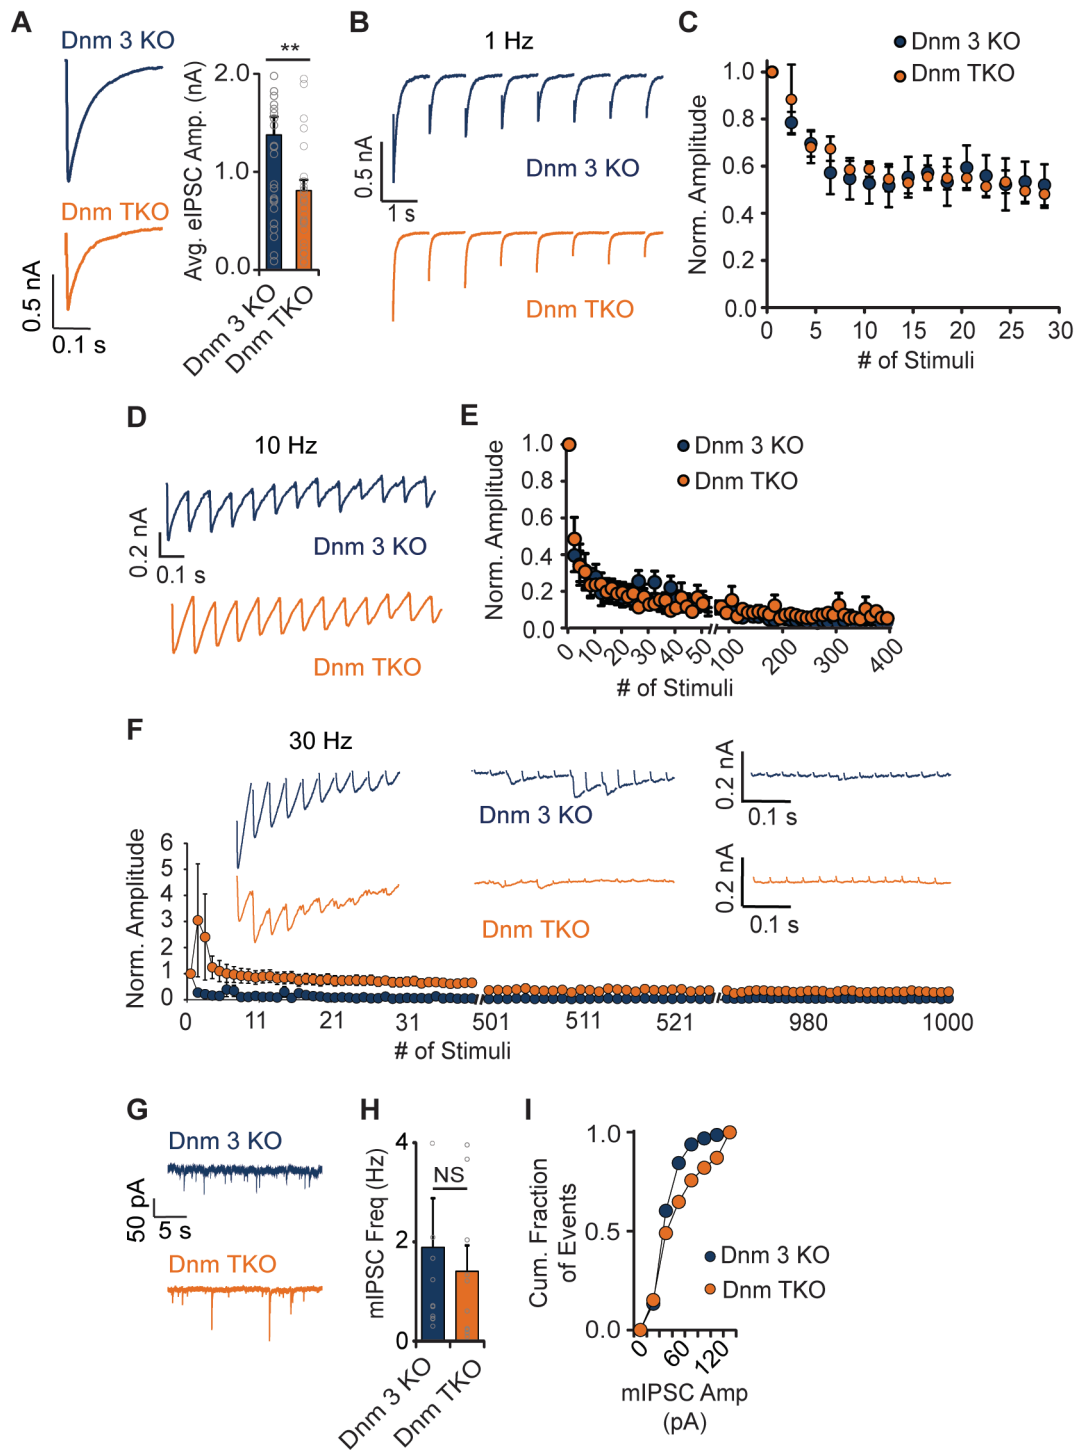

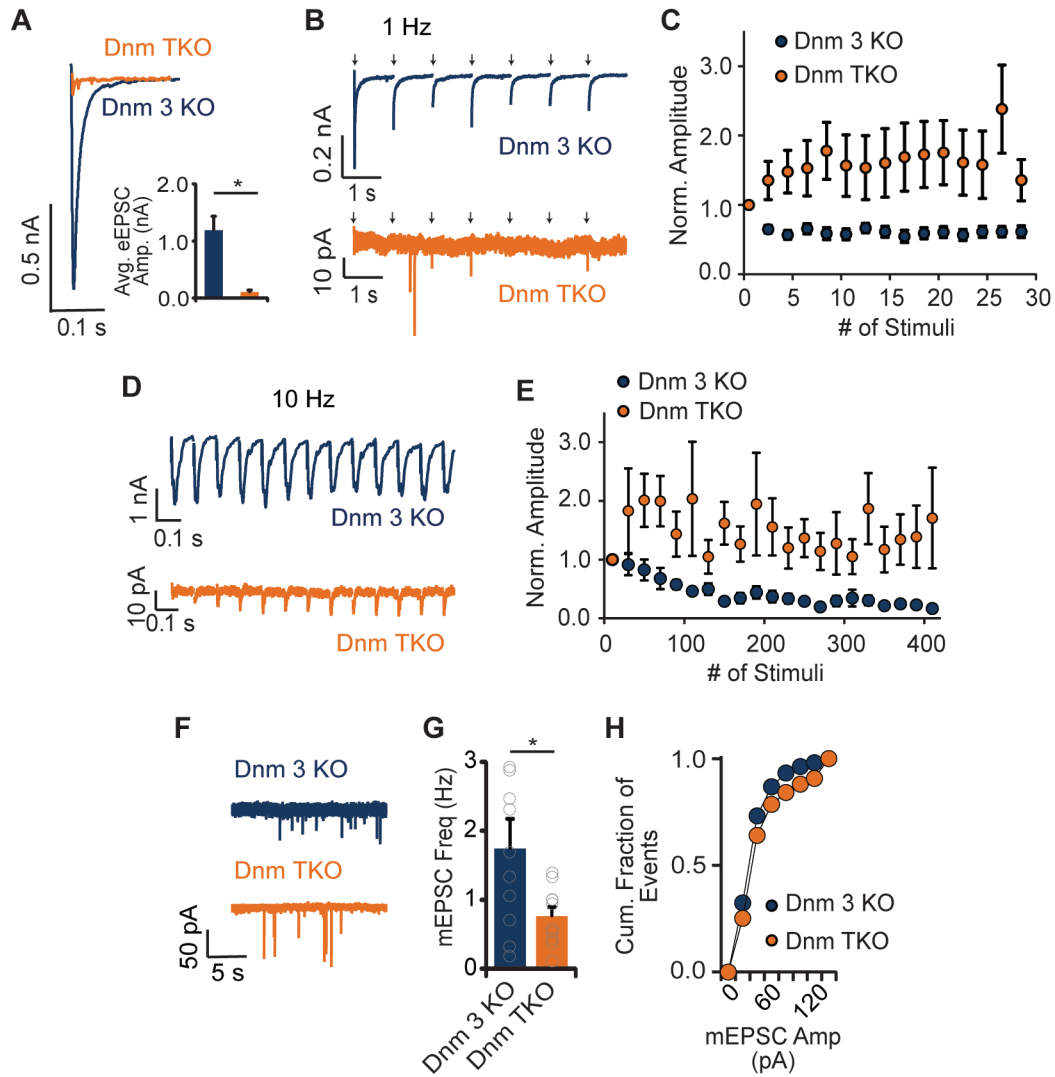

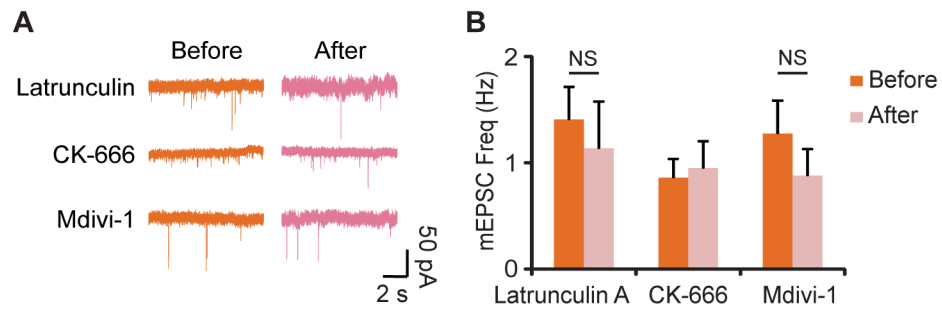

Source: https://www.biorxiv.org/content/10.1101/2020.06.12.147975v1.full.pdf
